# Supplementary material
Source: PubMed Central journal article supplement (PMC5764543)

## Supporting Information

### Grassystatins D–F, Potent Aspartic Protease Inhibitors from Marine Cyanobacteria as Potential Antimetastatic Agents Targeting Invasive Breast Cancer

Fatma H. Al-Awadhi,<sup>†,‡</sup> Brian K. Law,<sup>‡,§</sup> Valerie J. Paul<sup>⊥</sup> and Hendrik Luesch<sup>\*,†,‡</sup>

<sup>†</sup>*Department of Medicinal Chemistry*, <sup>‡</sup>*Center for Natural Products, Drug Discovery and Development (CNPD3)*, <sup>§</sup>*Department of Pharmacology and Therapeutics, University of Florida, Gainesville*. <sup>⊥</sup>*Smithsonian Marine Station, Fort Pierce, Florida, USA*.

\* Corresponding author. E-mail: luesch@cop.ufl.edu

| <b>Contents</b>                                                                            | <b>Page Number</b> |
|--------------------------------------------------------------------------------------------|--------------------|
| Figure S1. Docked Structures of Pepstatin A in Cathepsin D                                 | S3                 |
| <sup>1</sup> H NMR Spectrum of Grassystatin D ( <b>1</b> ) in DMSO- <i>d</i> <sub>6</sub>  | S4                 |
| <sup>13</sup> C NMR Spectrum of Grassystatin D ( <b>1</b> ) in DMSO- <i>d</i> <sub>6</sub> | S5                 |
| APT Spectrum of Grassystatin D ( <b>1</b> ) in DMSO- <i>d</i> <sub>6</sub>                 | S6                 |
| COSY Spectrum of Grassystatin D ( <b>1</b> ) in DMSO- <i>d</i> <sub>6</sub>                | S7                 |
| HSQC Spectrum of Grassystatin D ( <b>1</b> ) in DMSO- <i>d</i> <sub>6</sub>                | S8                 |
| HMBC Spectrum of Grassystatin D ( <b>1</b> ) in DMSO- <i>d</i> <sub>6</sub>                | S9                 |
| ROESY Spectrum of Grassystatin D ( <b>1</b> ) in DMSO- <i>d</i> <sub>6</sub>               | S10                |
| TOCSY Spectrum of Grassystatin D ( <b>1</b> ) in DMSO- <i>d</i> <sub>6</sub>               | S11                |
| <sup>1</sup> H NMR Spectrum of Grassystatin E ( <b>2</b> ) in DMSO- <i>d</i> <sub>6</sub>  | S12                |

|                                                                                           |     |
|-------------------------------------------------------------------------------------------|-----|
| COSY Spectrum of Grassystatin E ( <b>2</b> ) in DMSO- <i>d</i> <sub>6</sub>               | S13 |
| HSQC Spectrum of Grassystatin E ( <b>2</b> ) in DMSO- <i>d</i> <sub>6</sub>               | S14 |
| HMBC Spectrum of Grassystatin E ( <b>2</b> ) in DMSO- <i>d</i> <sub>6</sub>               | S15 |
| ROESY Spectrum of Grassystatin E ( <b>2</b> ) in DMSO- <i>d</i> <sub>6</sub>              | S16 |
| TOCSY Spectrum of Grassystatin E ( <b>2</b> ) in DMSO- <i>d</i> <sub>6</sub>              | S17 |
| <sup>1</sup> H NMR Spectrum of Grassystatin F ( <b>3</b> ) in DMSO- <i>d</i> <sub>6</sub> | S18 |
| COSY Spectrum of Grassystatin F ( <b>3</b> ) in DMSO- <i>d</i> <sub>6</sub>               | S19 |
| HSQC Spectrum of Grassystatin F ( <b>3</b> ) in DMSO- <i>d</i> <sub>6</sub>               | S20 |
| HMBC Spectrum of Grassystatin F ( <b>3</b> ) in DMSO- <i>d</i> <sub>6</sub>               | S21 |
| ROESY Spectrum of Grassystatin F ( <b>3</b> ) in DMSO- <i>d</i> <sub>6</sub>              | S22 |
| TOCSY Spectrum of Grassystatin F ( <b>3</b> ) in DMSO- <i>d</i> <sub>6</sub>              | S23 |

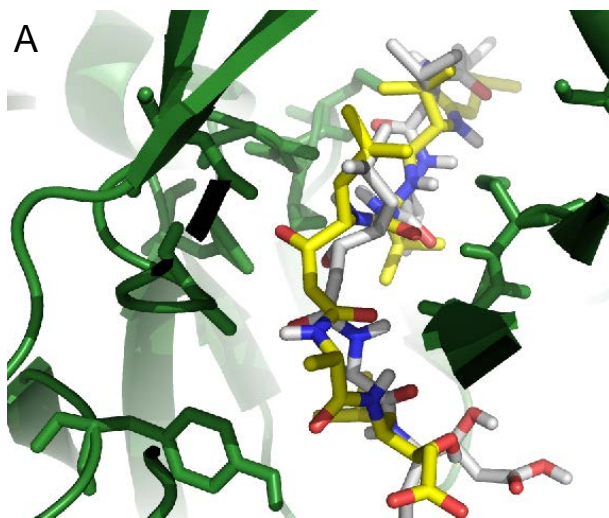

**Figure S1.** Overlay of docked structures of pepstatin A (**6**) (white) with previously published docked structure (yellow) in cathepsin D (1LYB) (green).

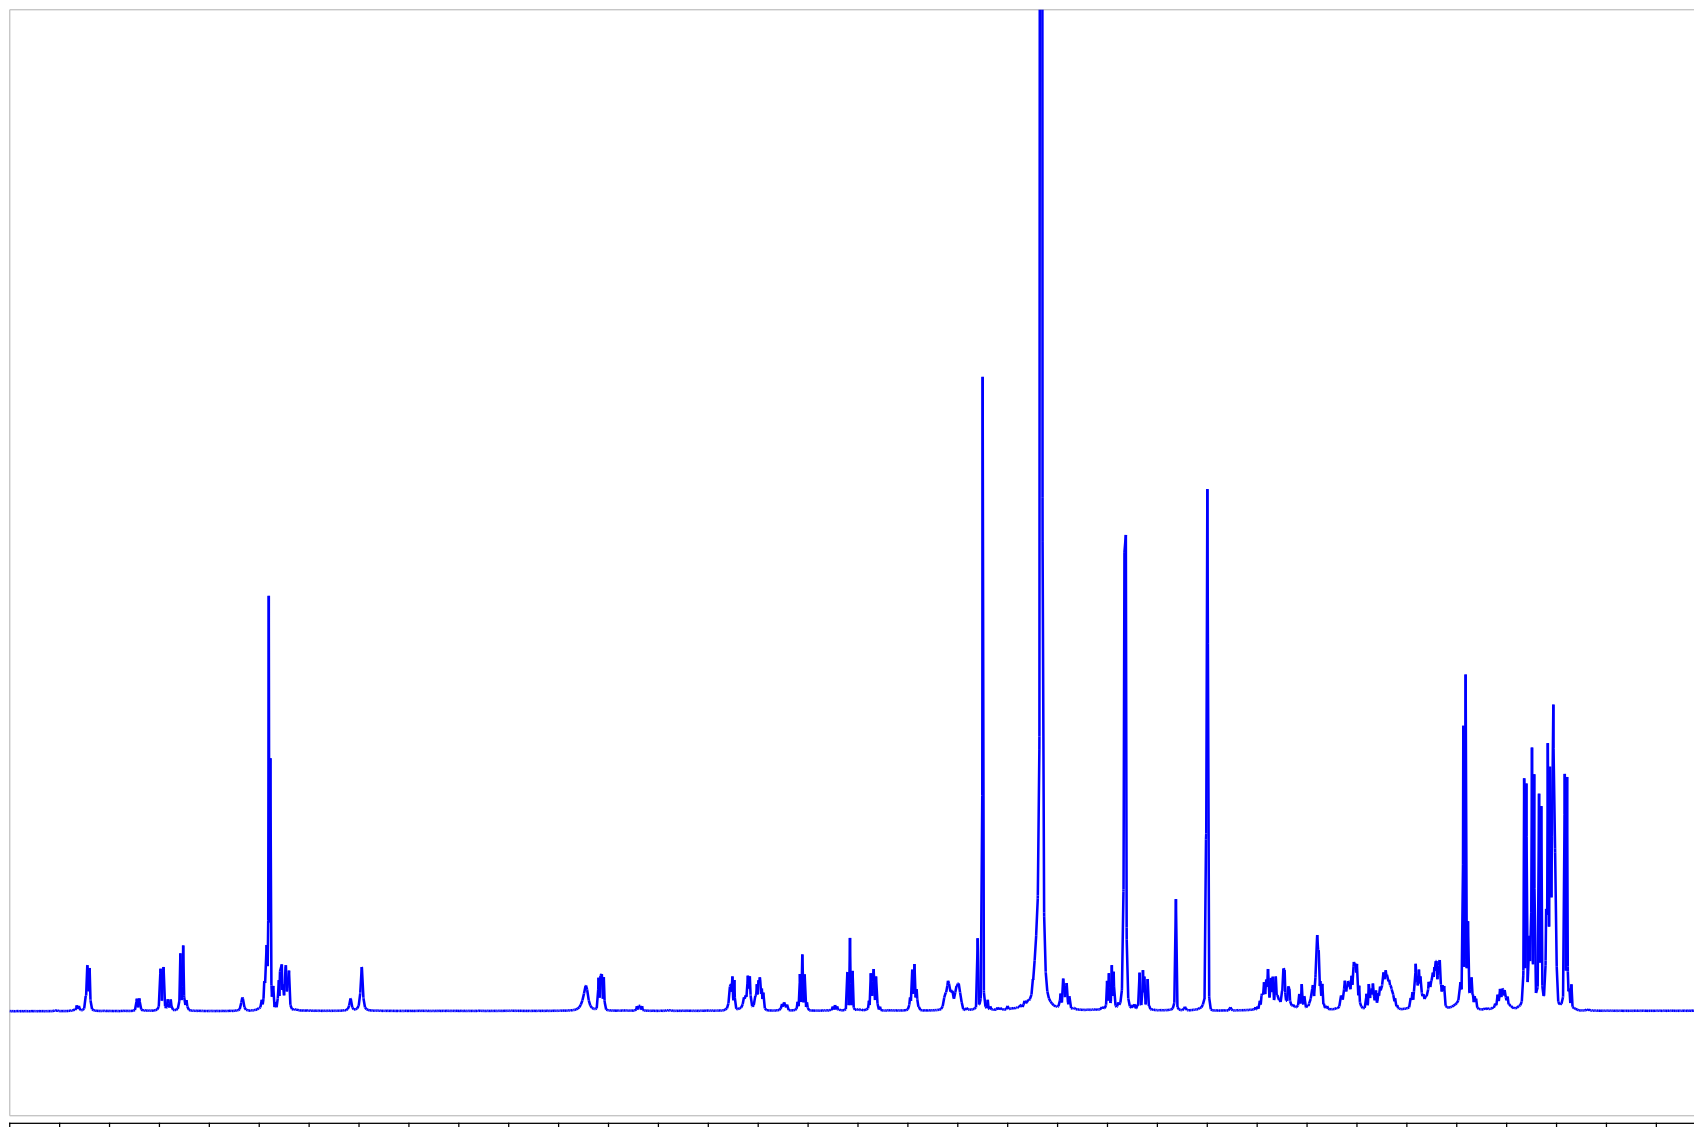

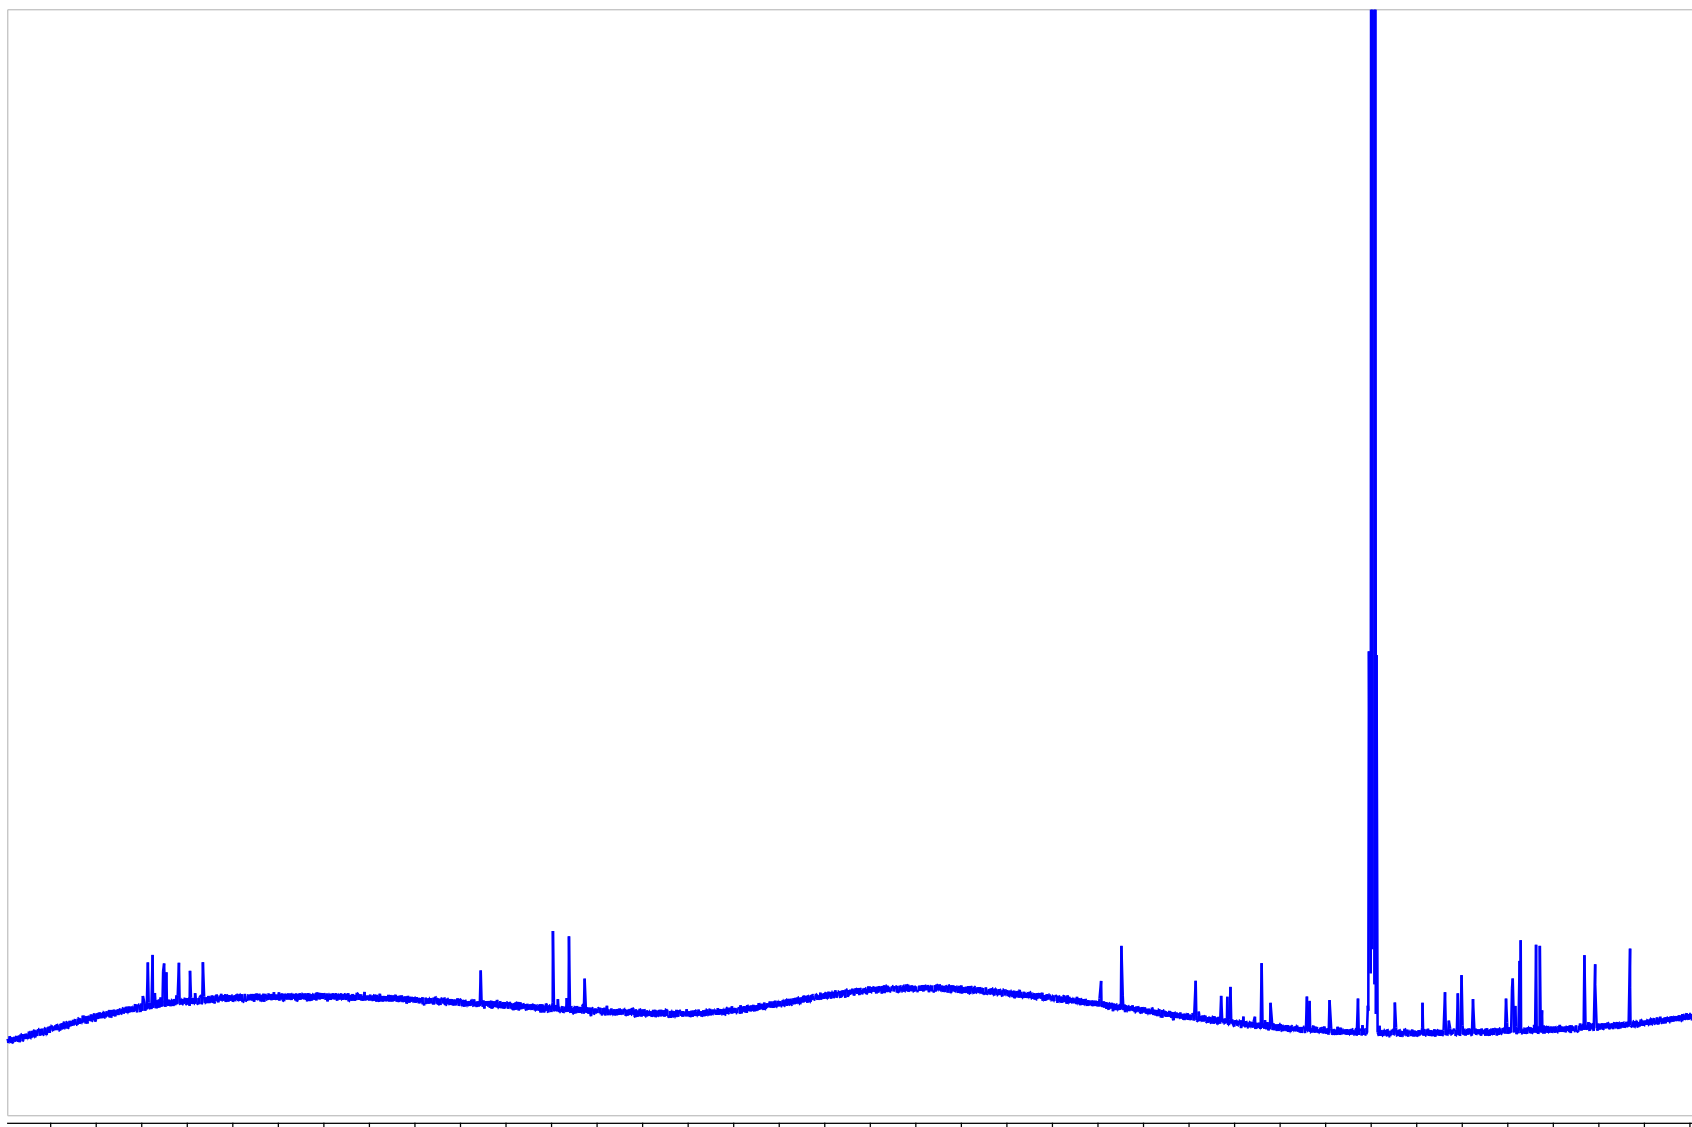

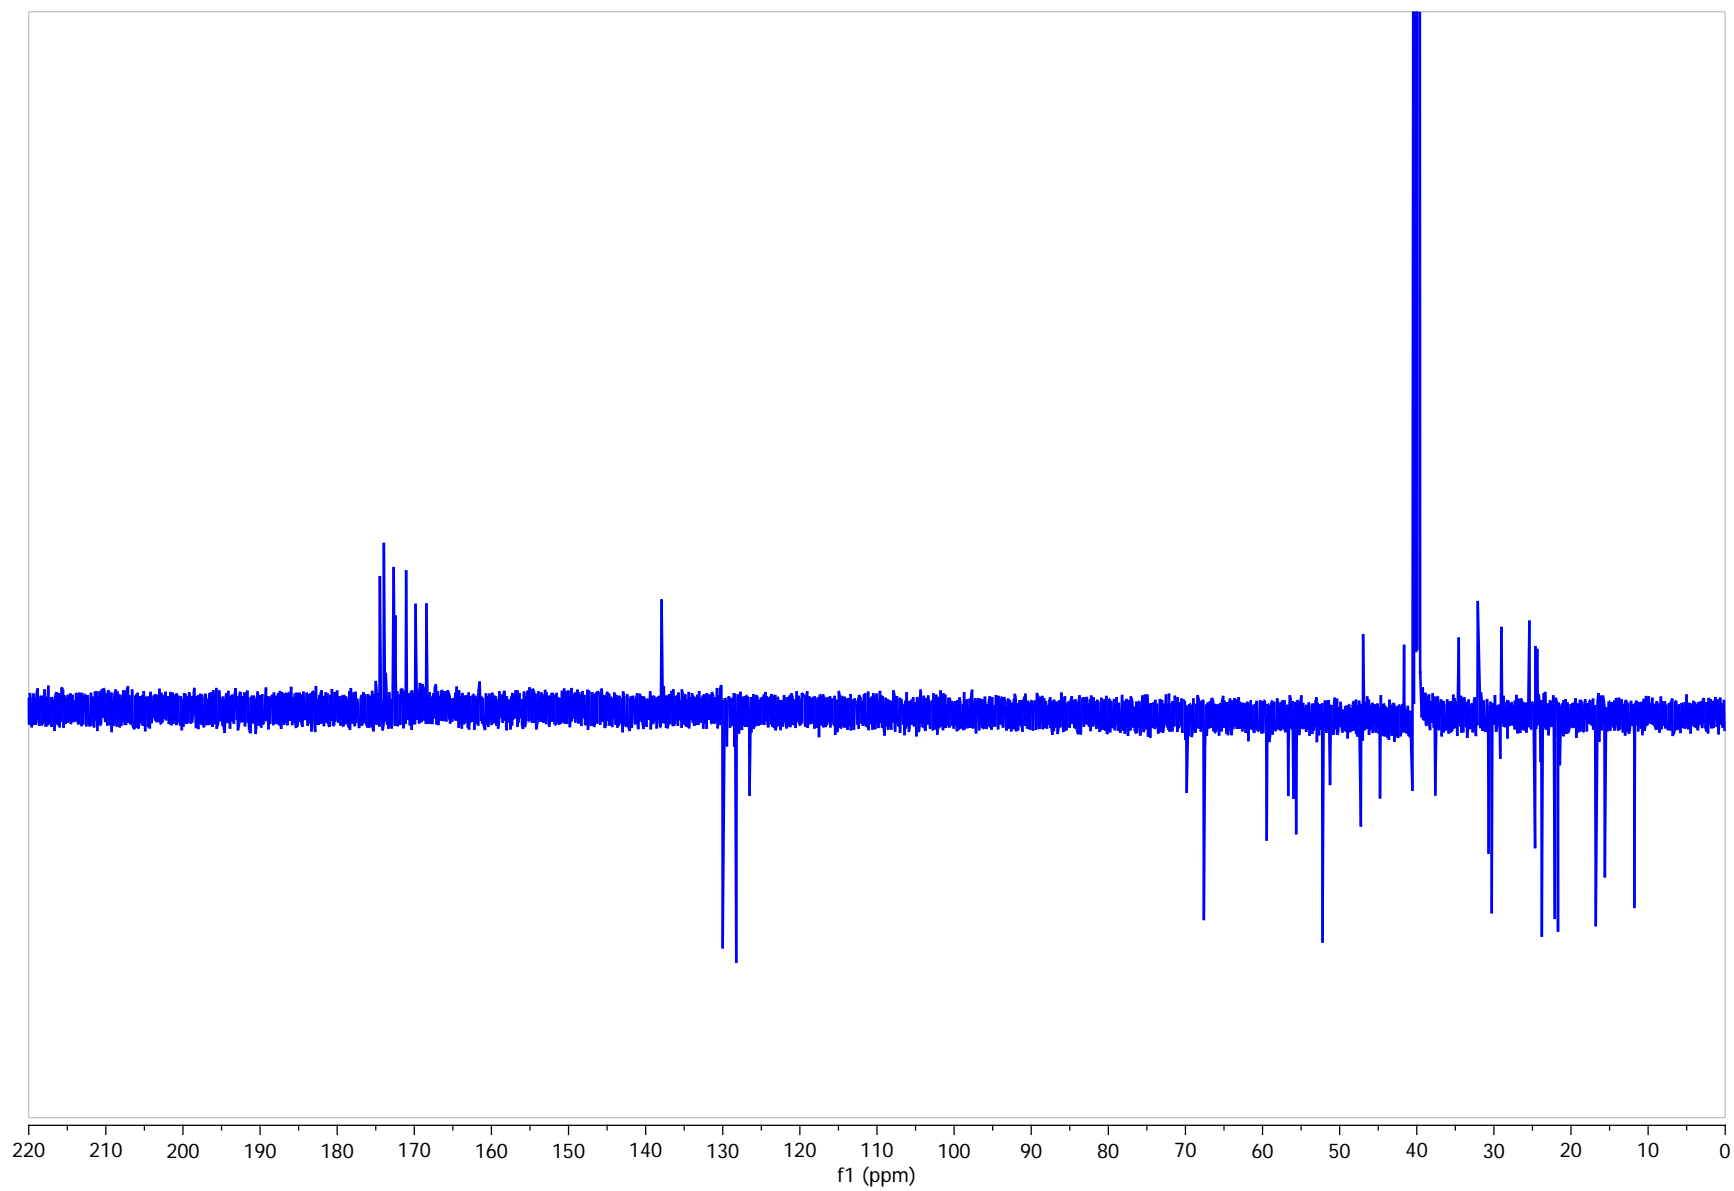

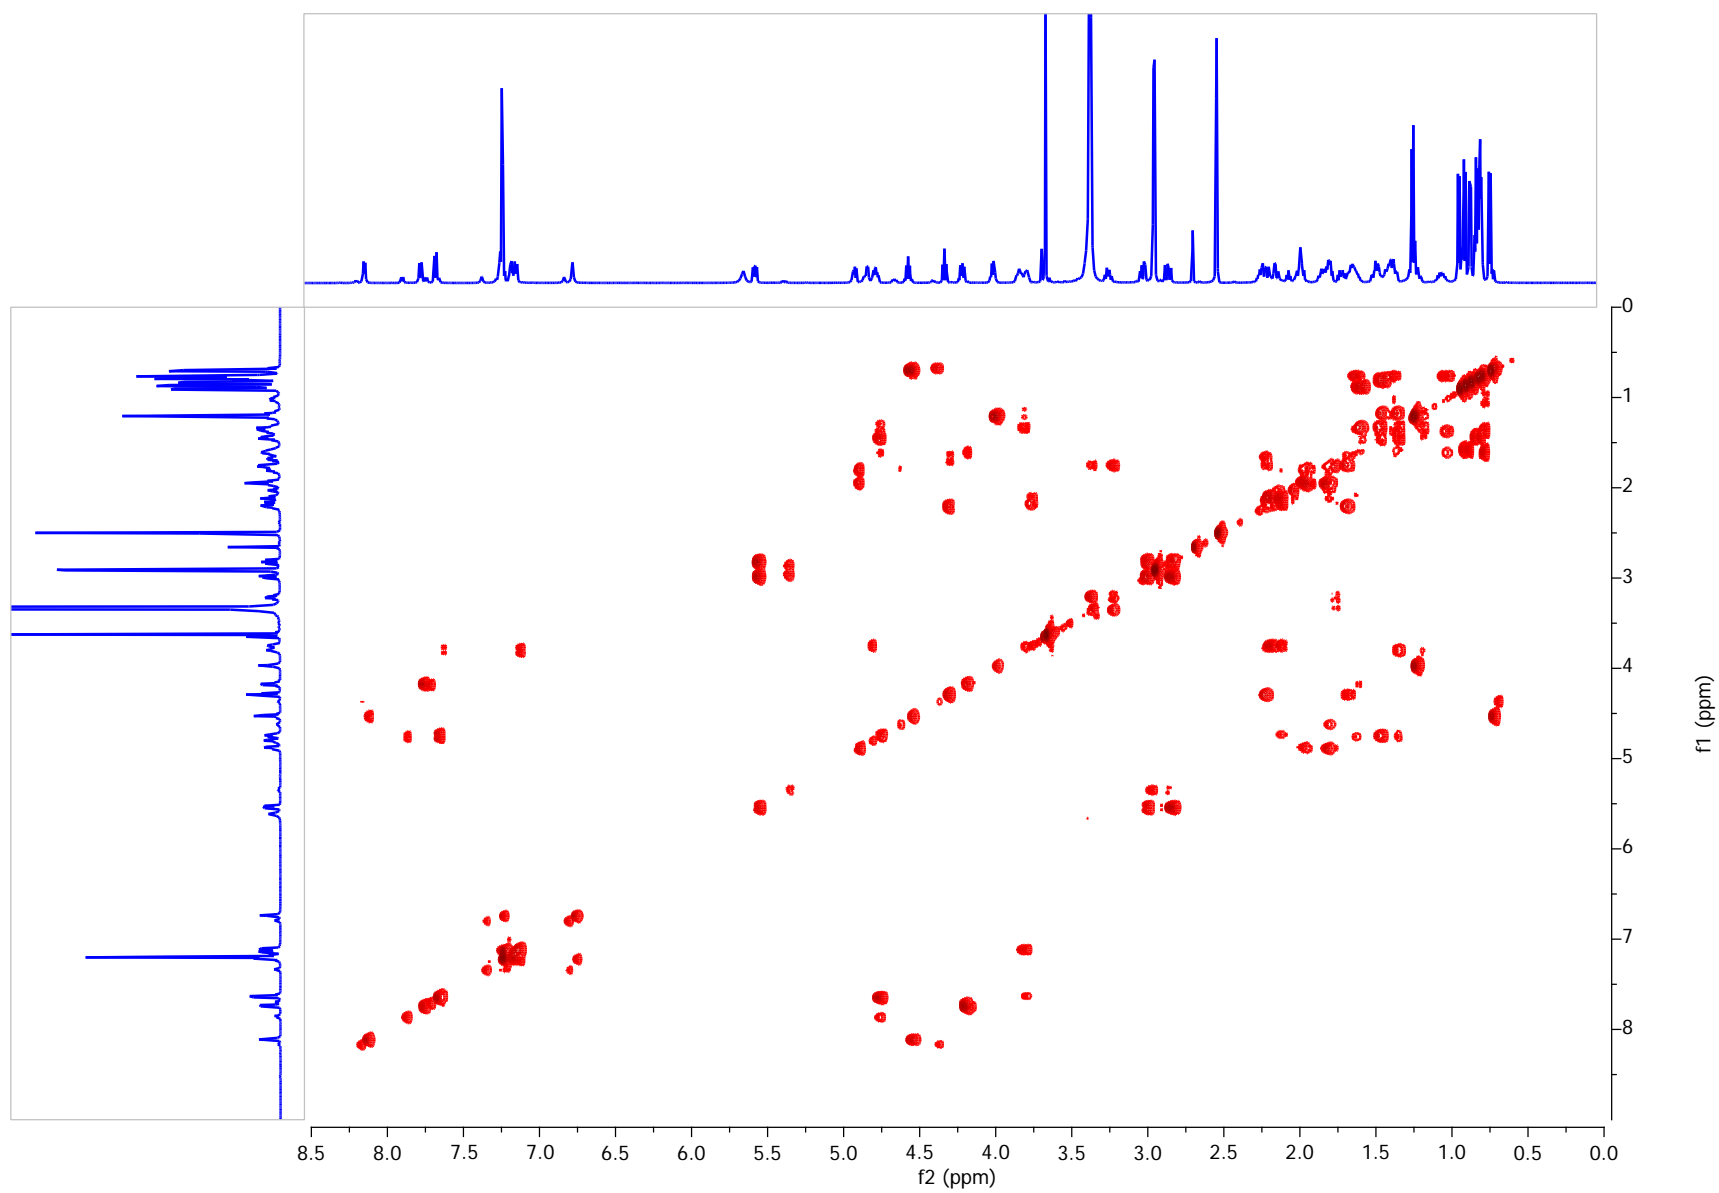

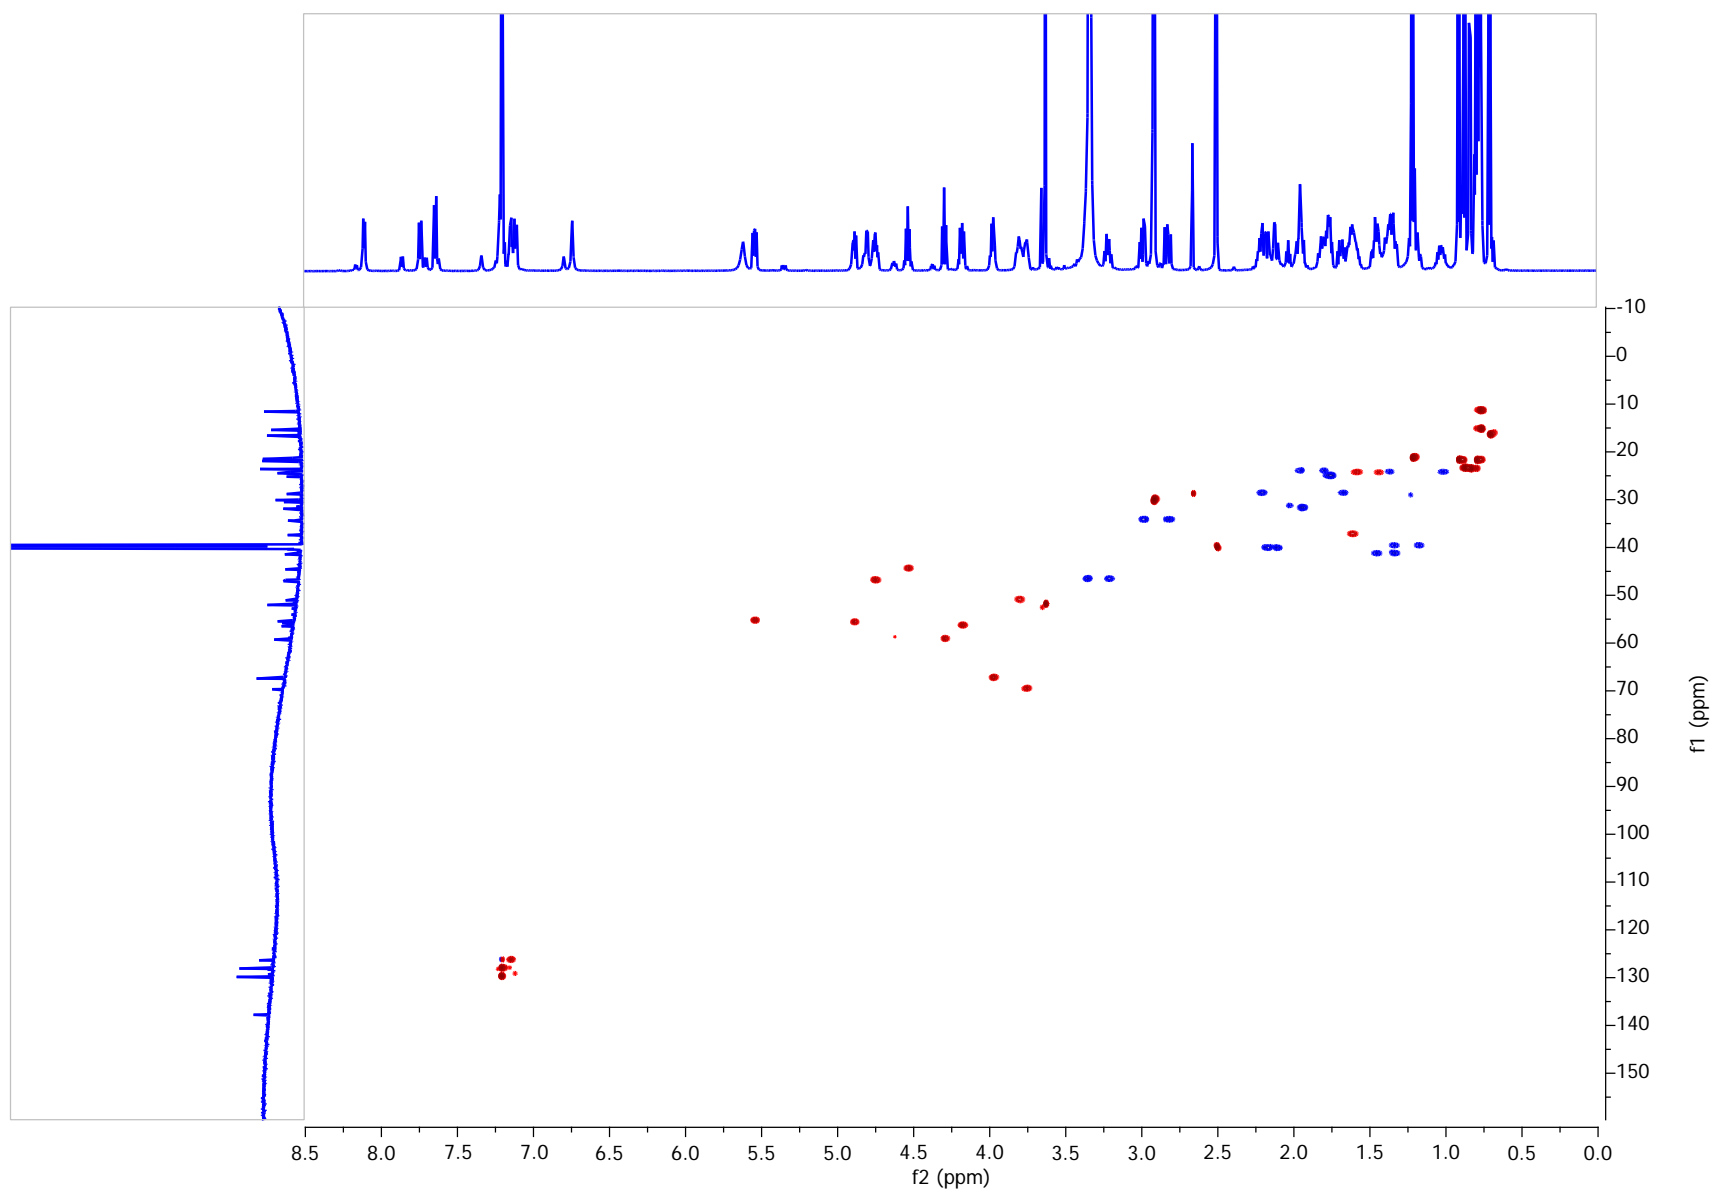



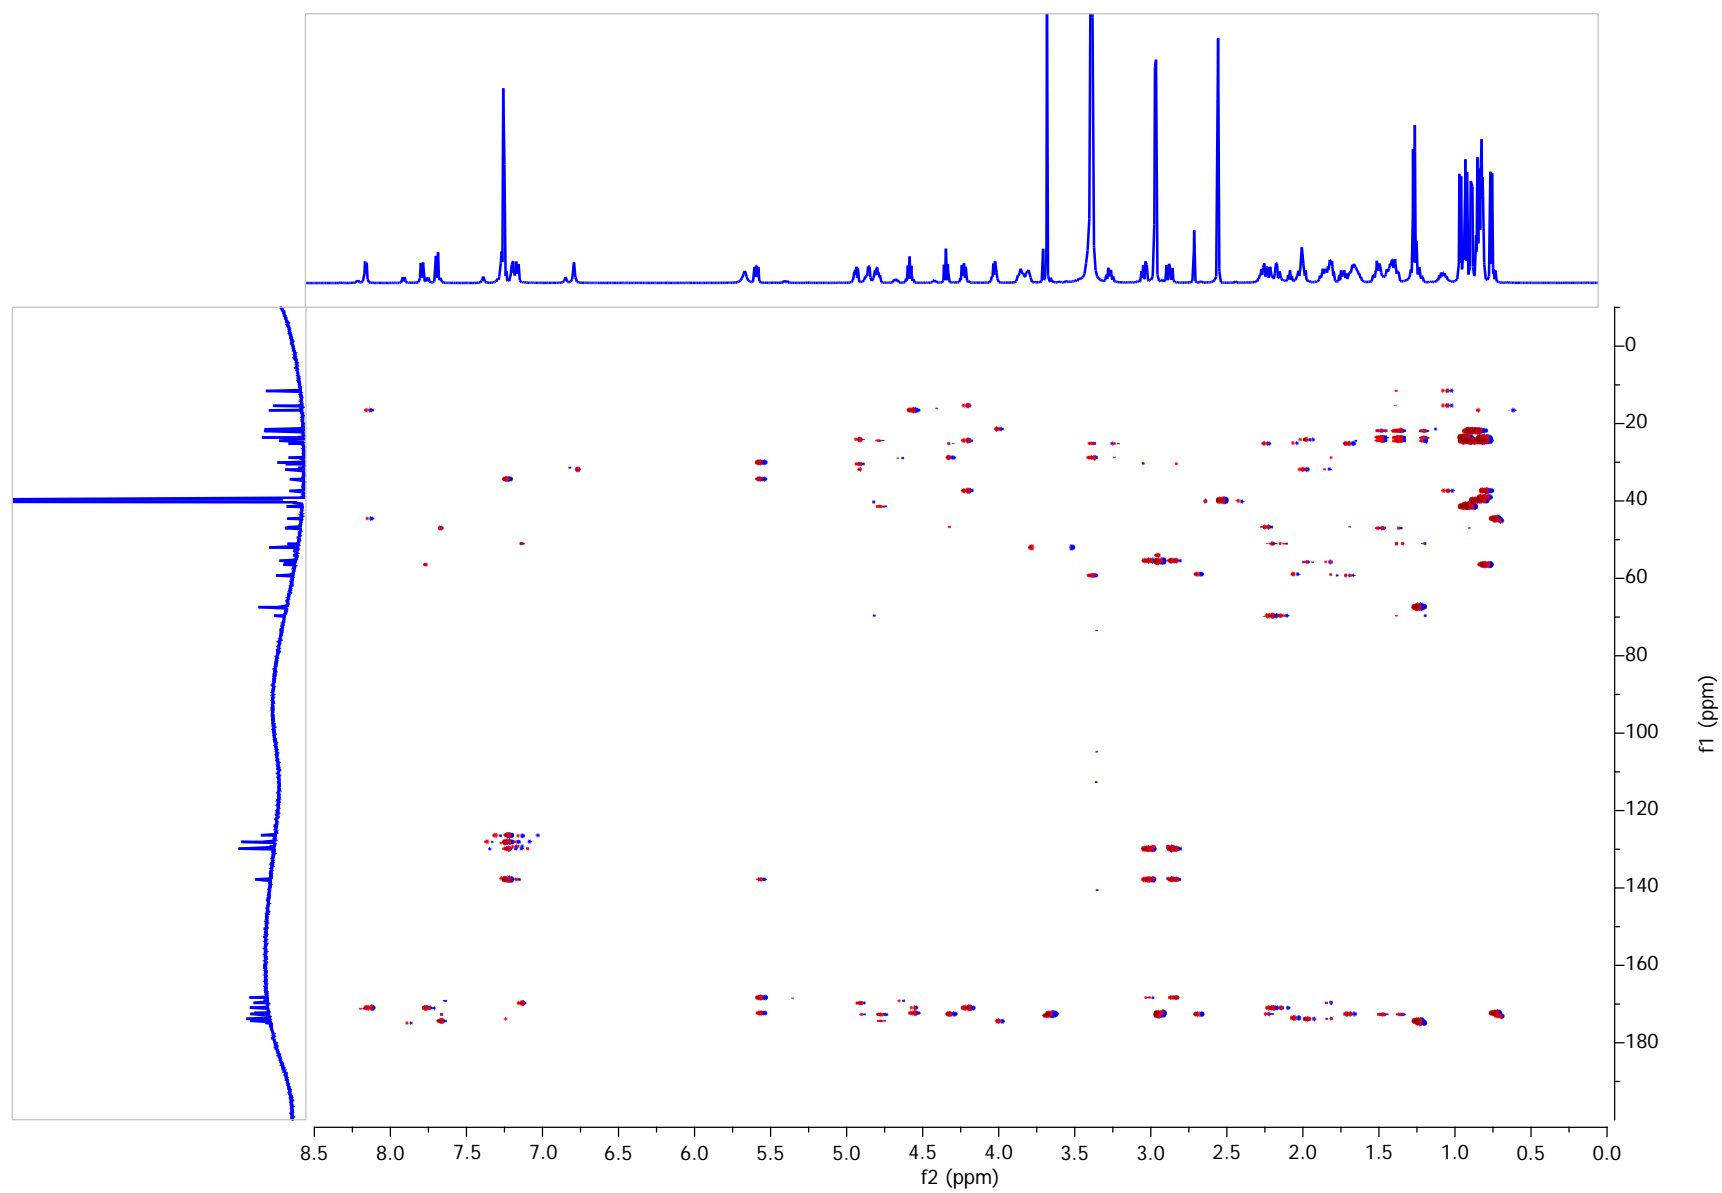

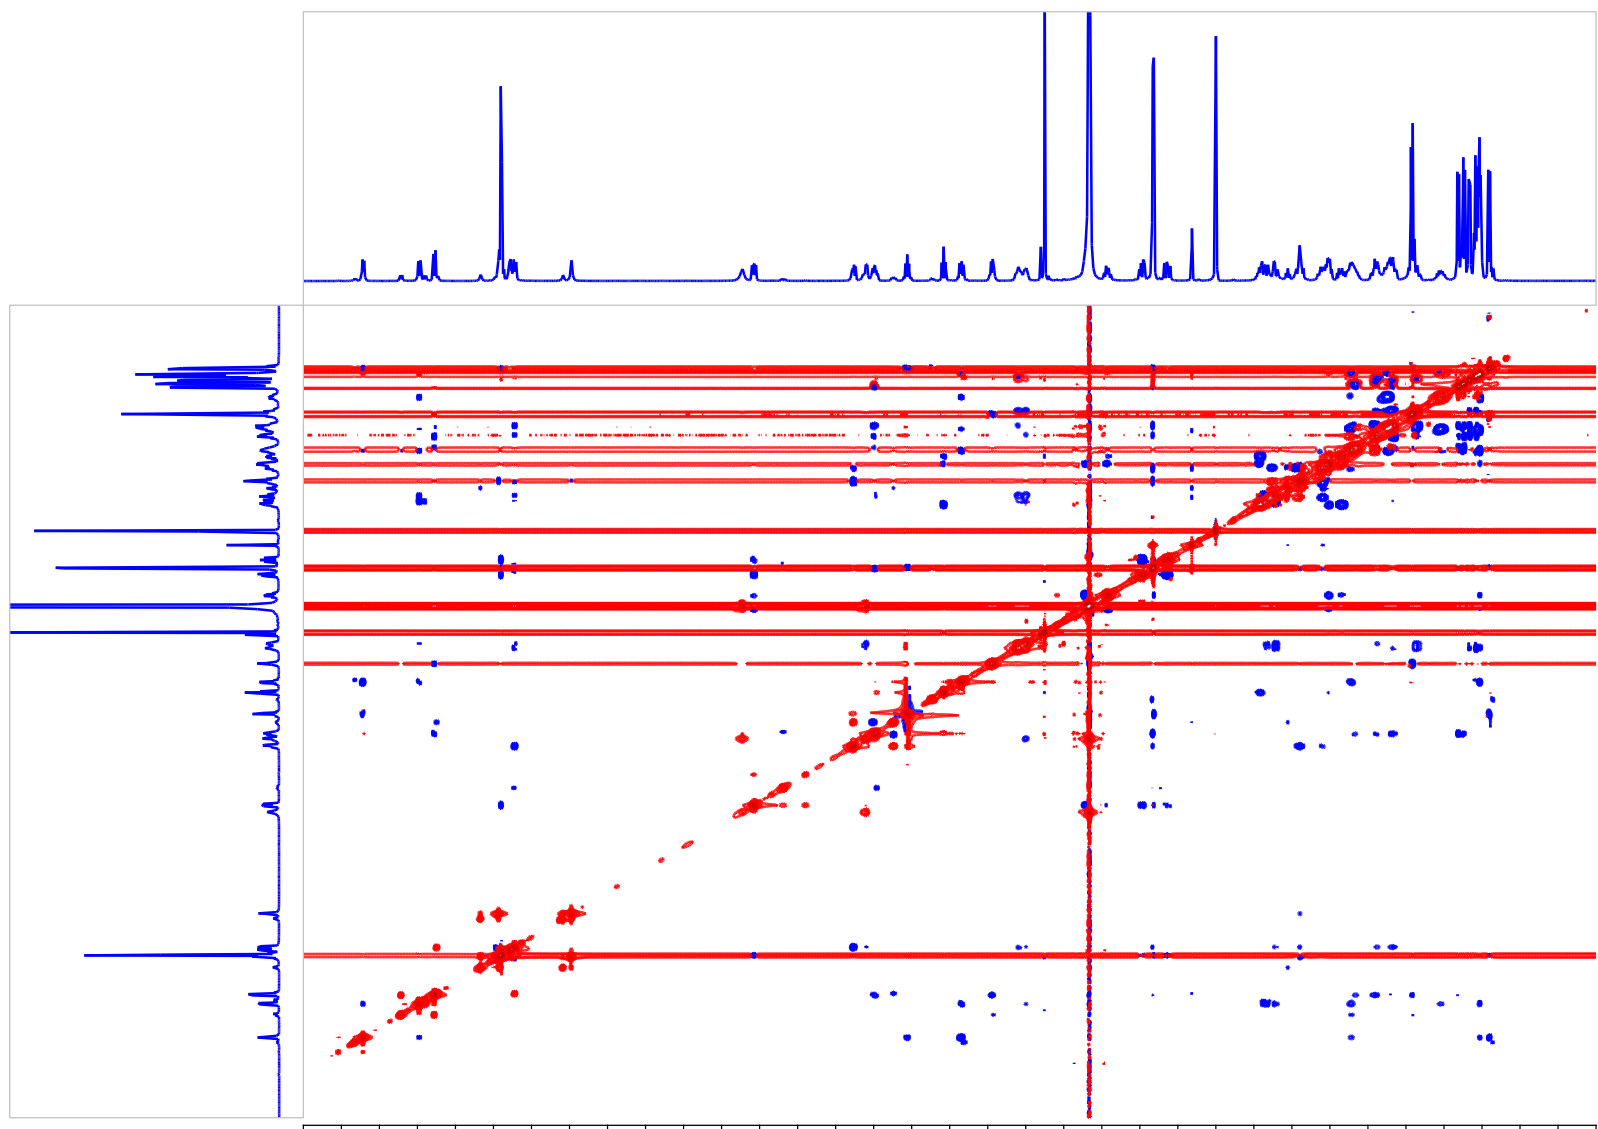

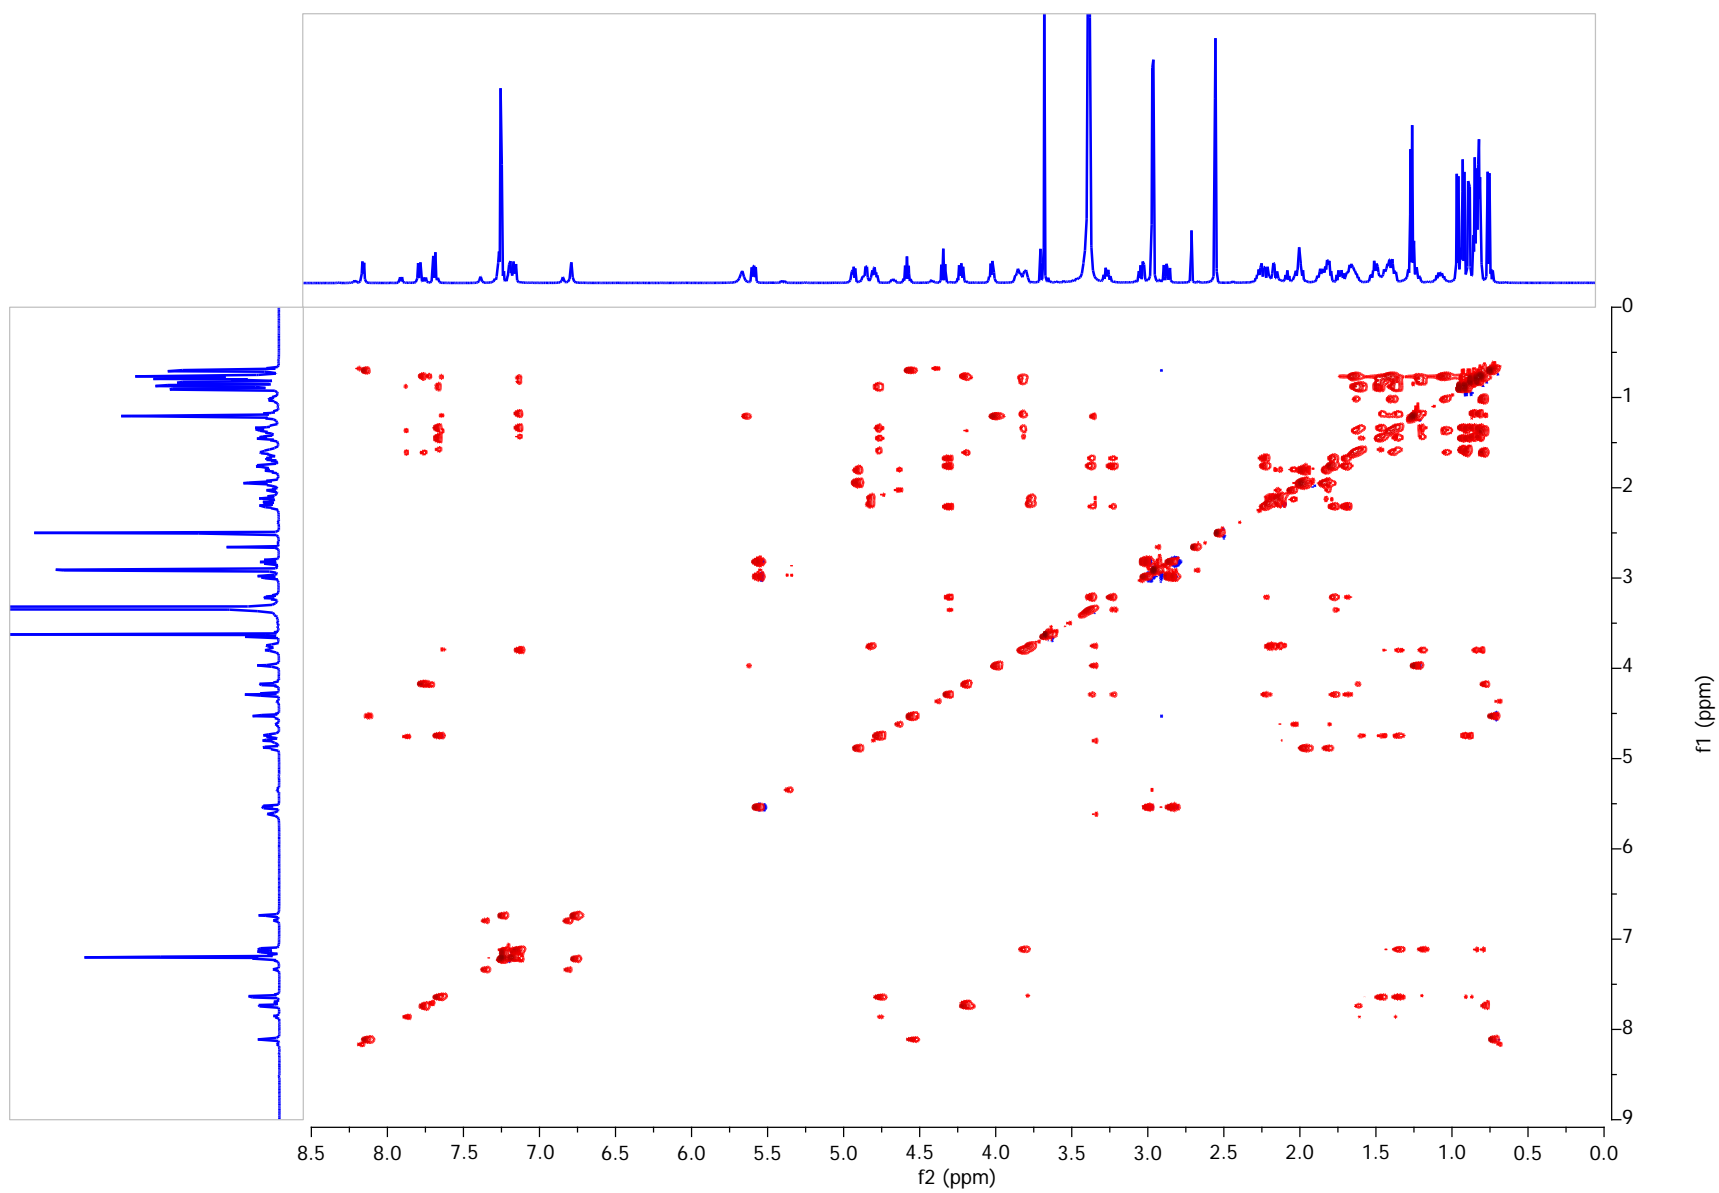

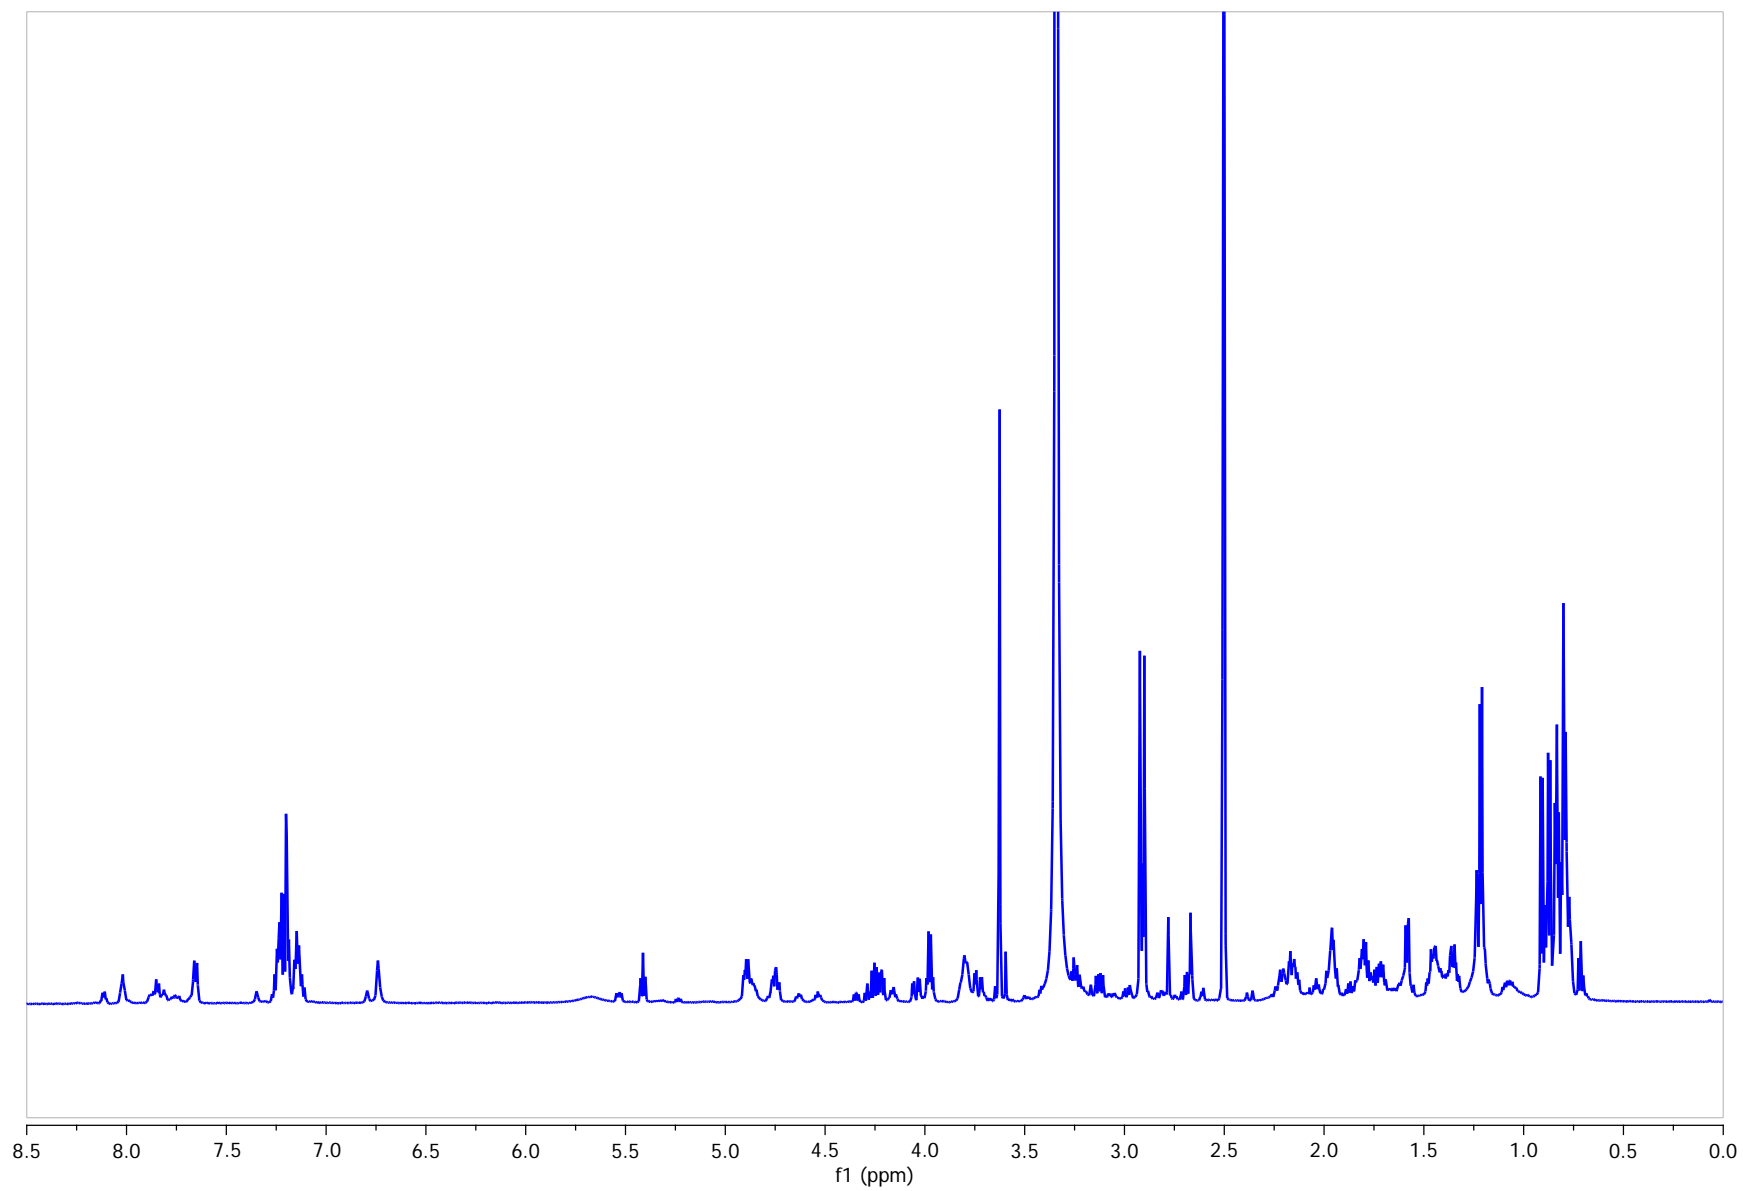

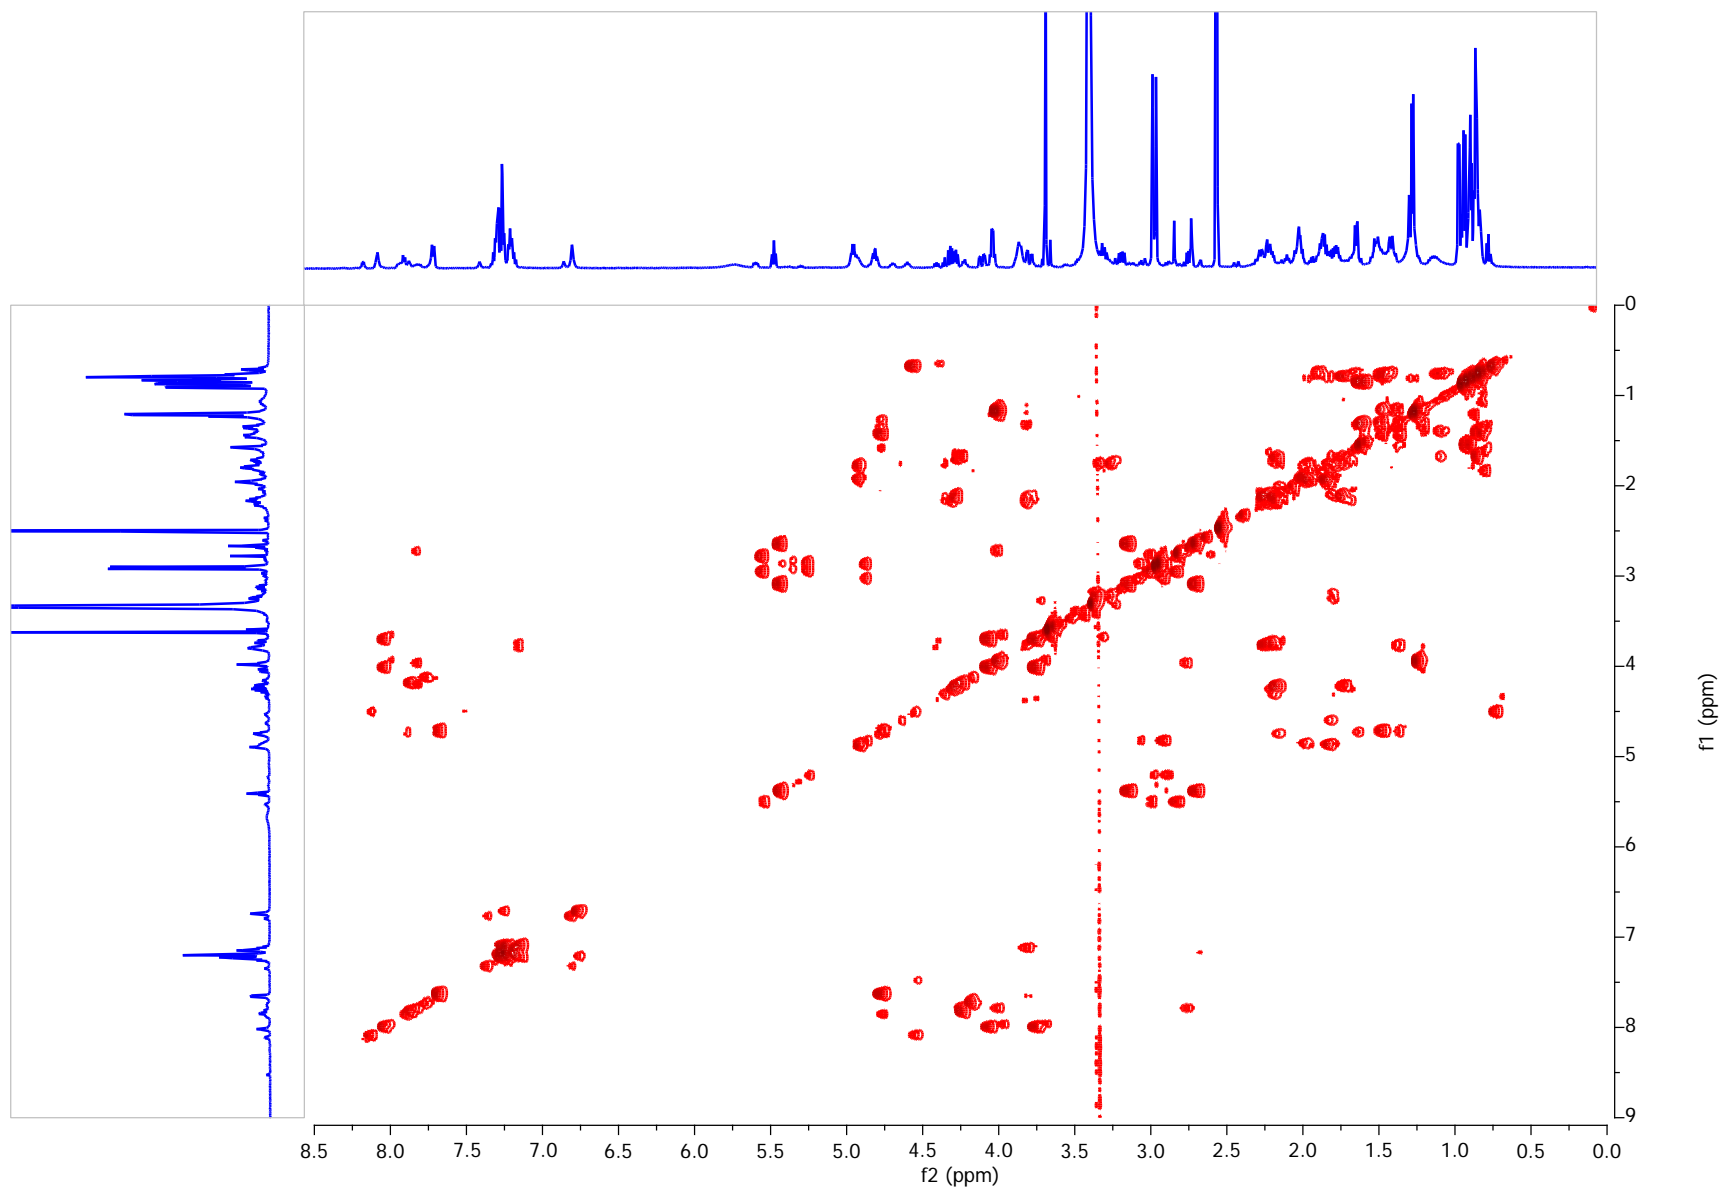

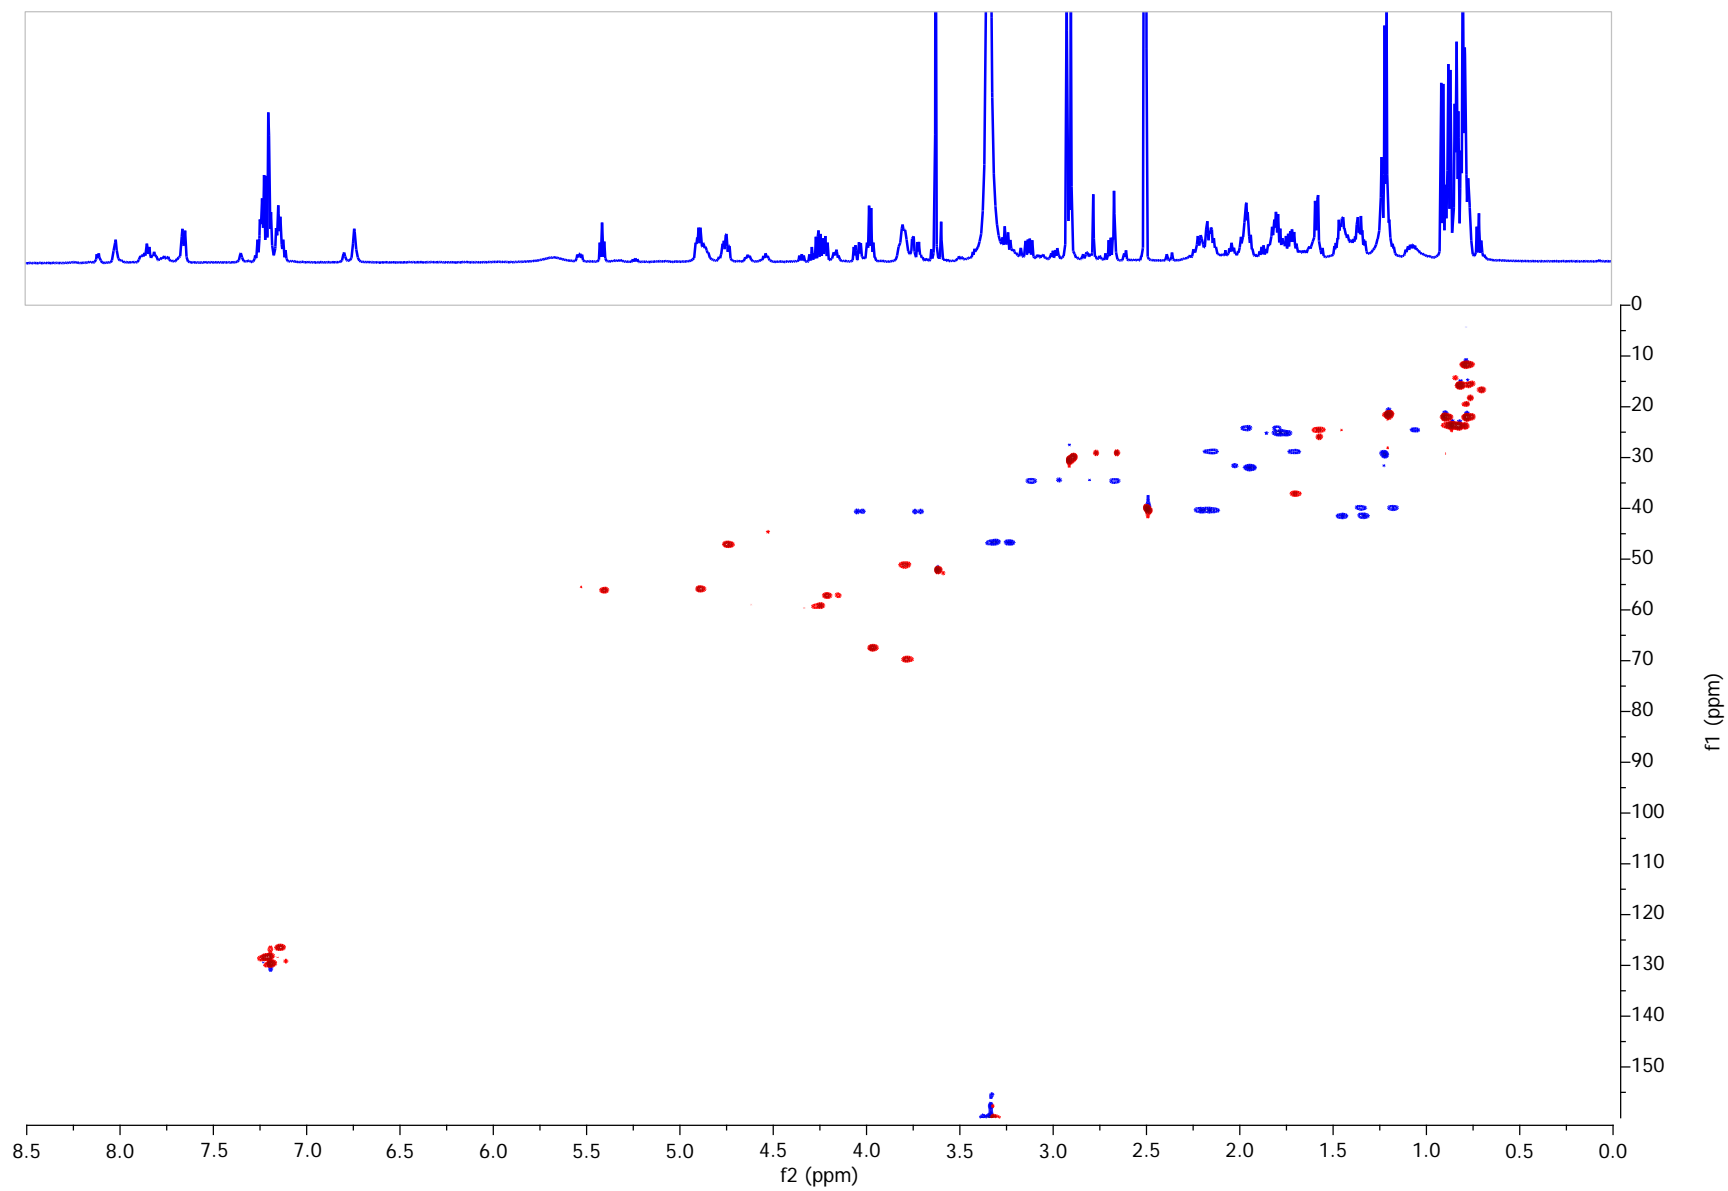

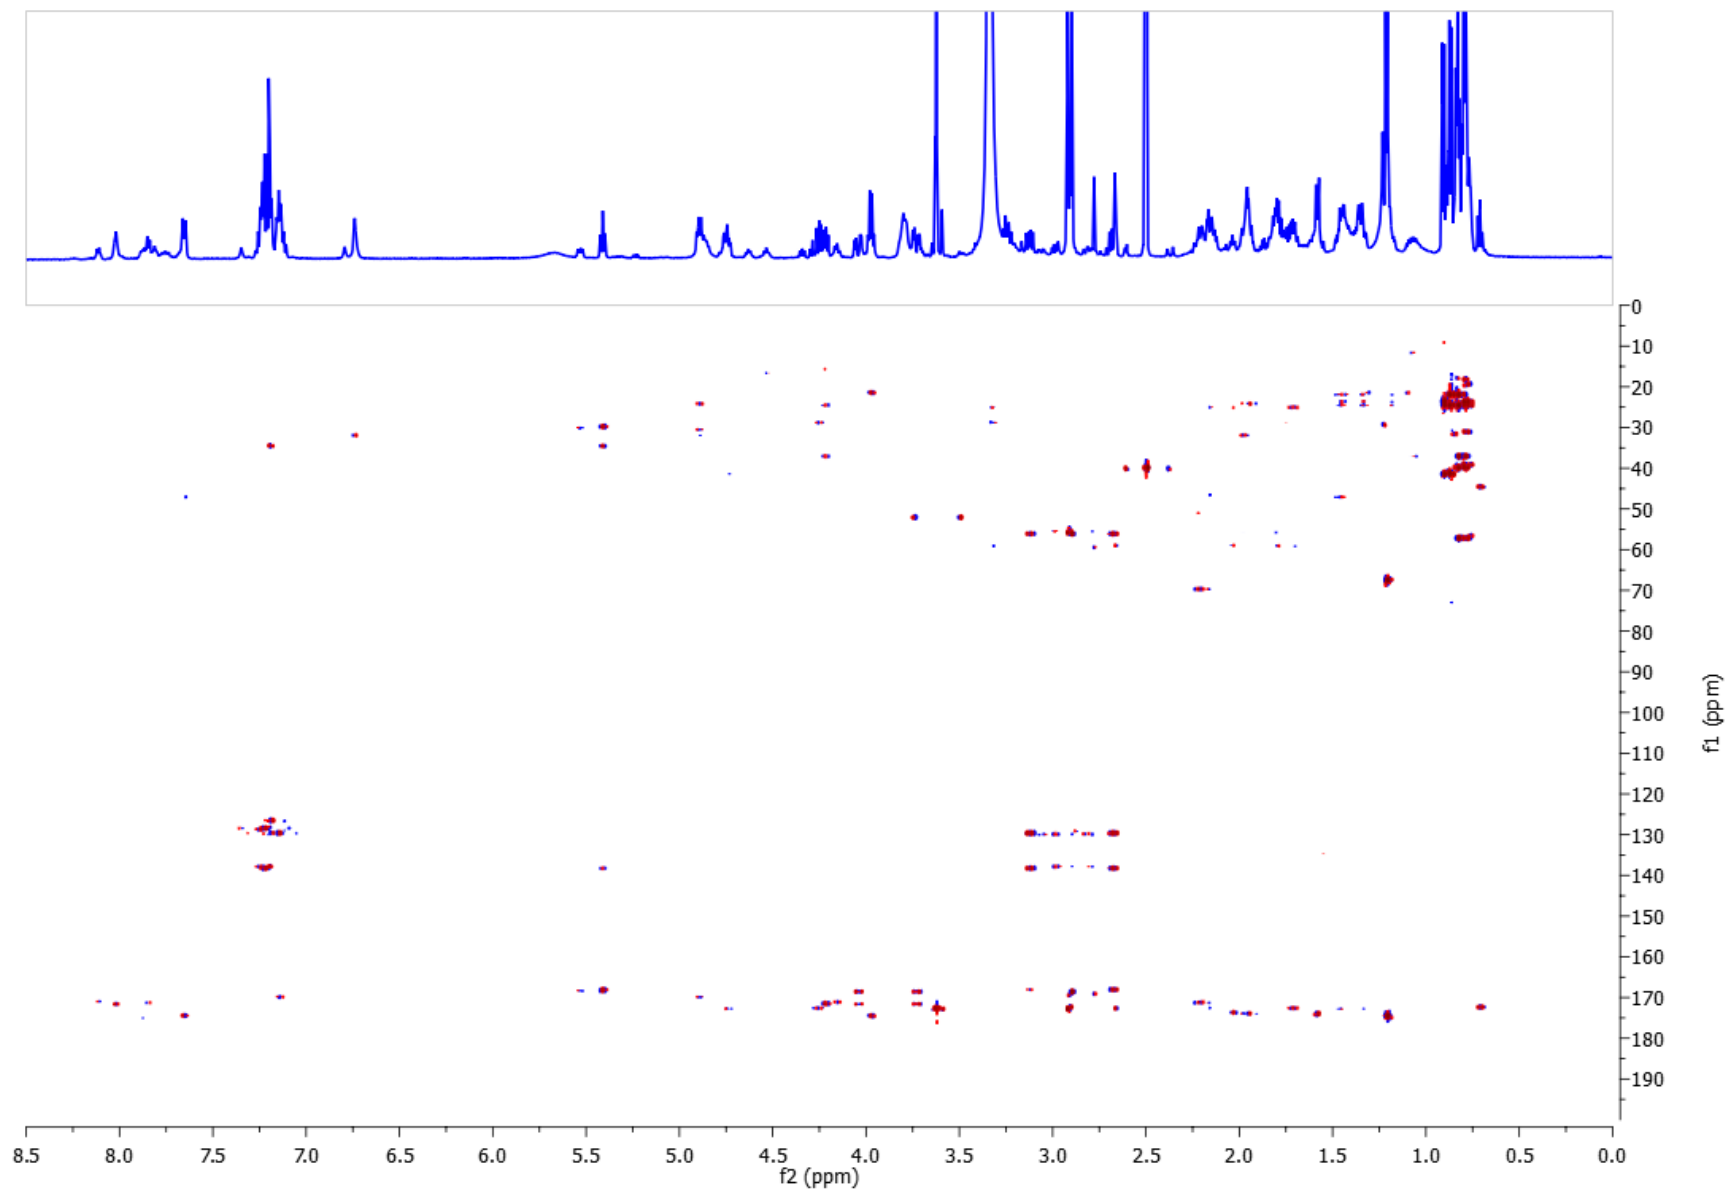

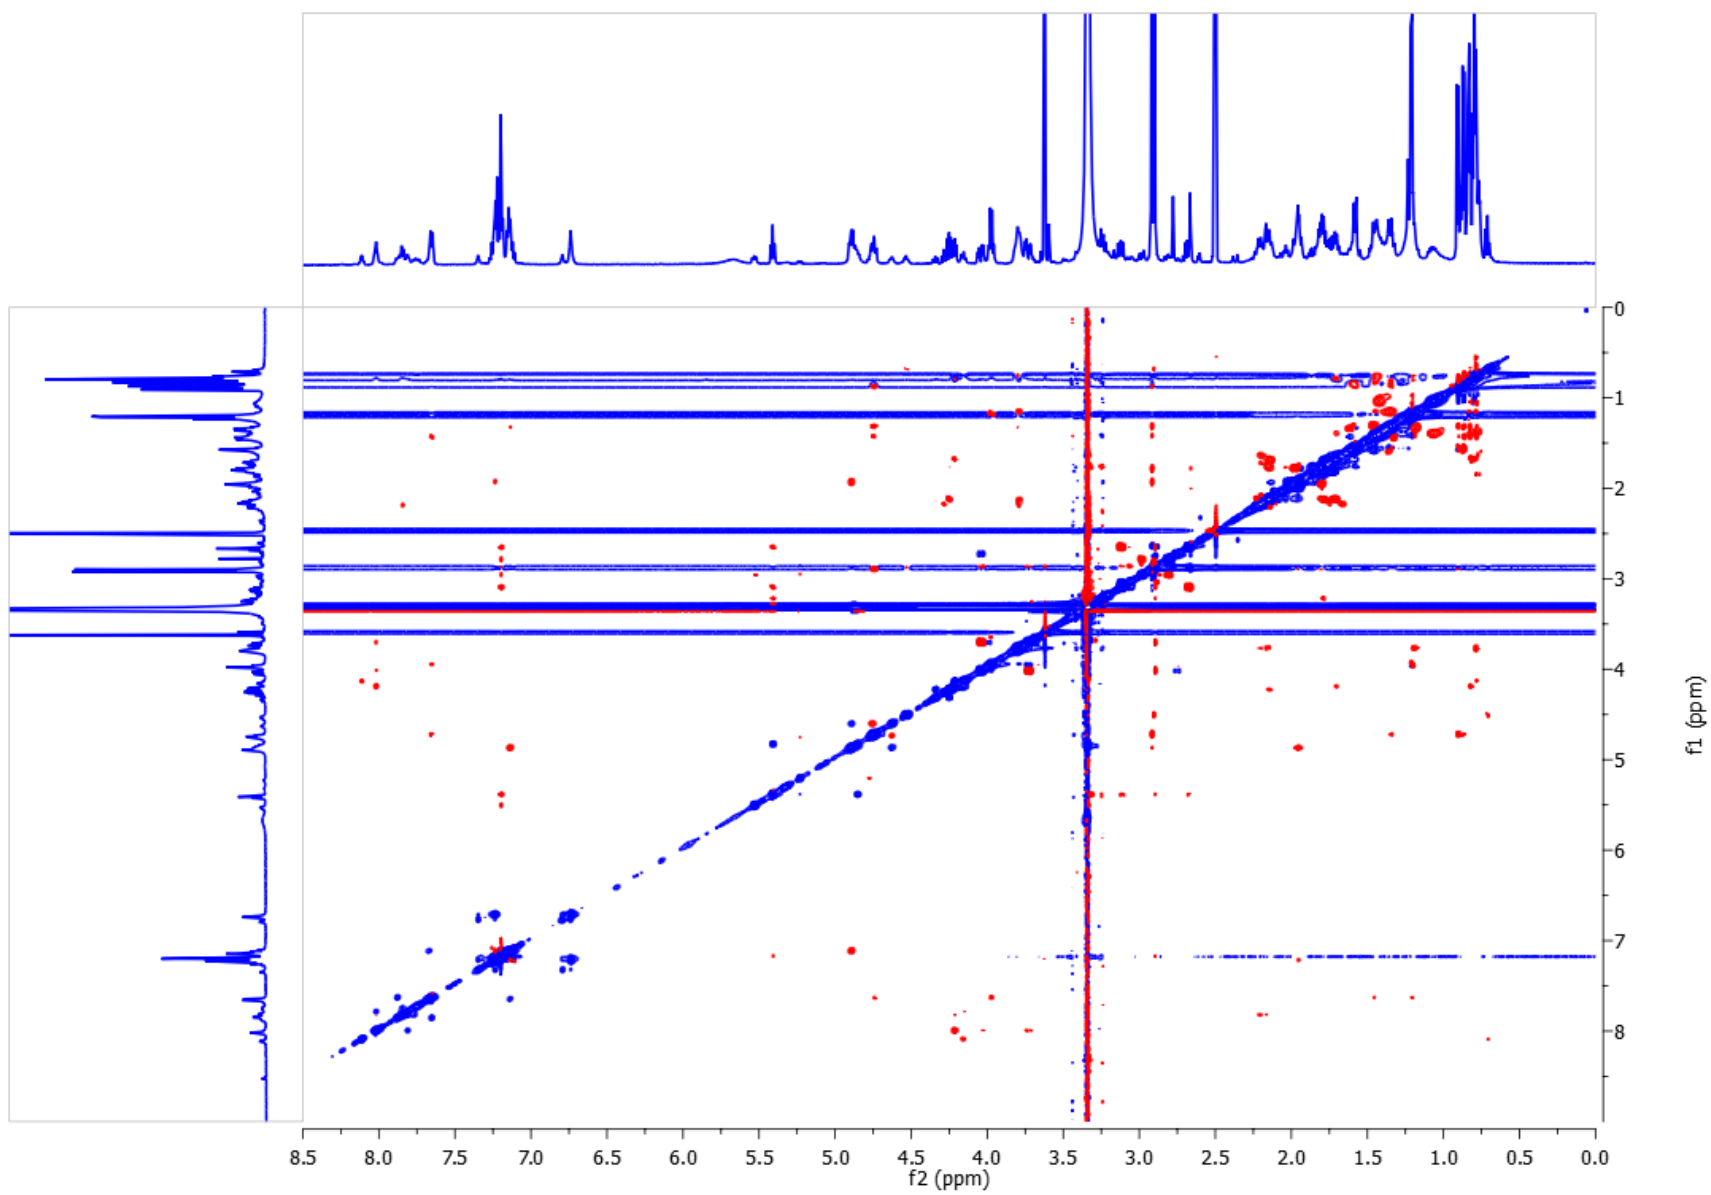



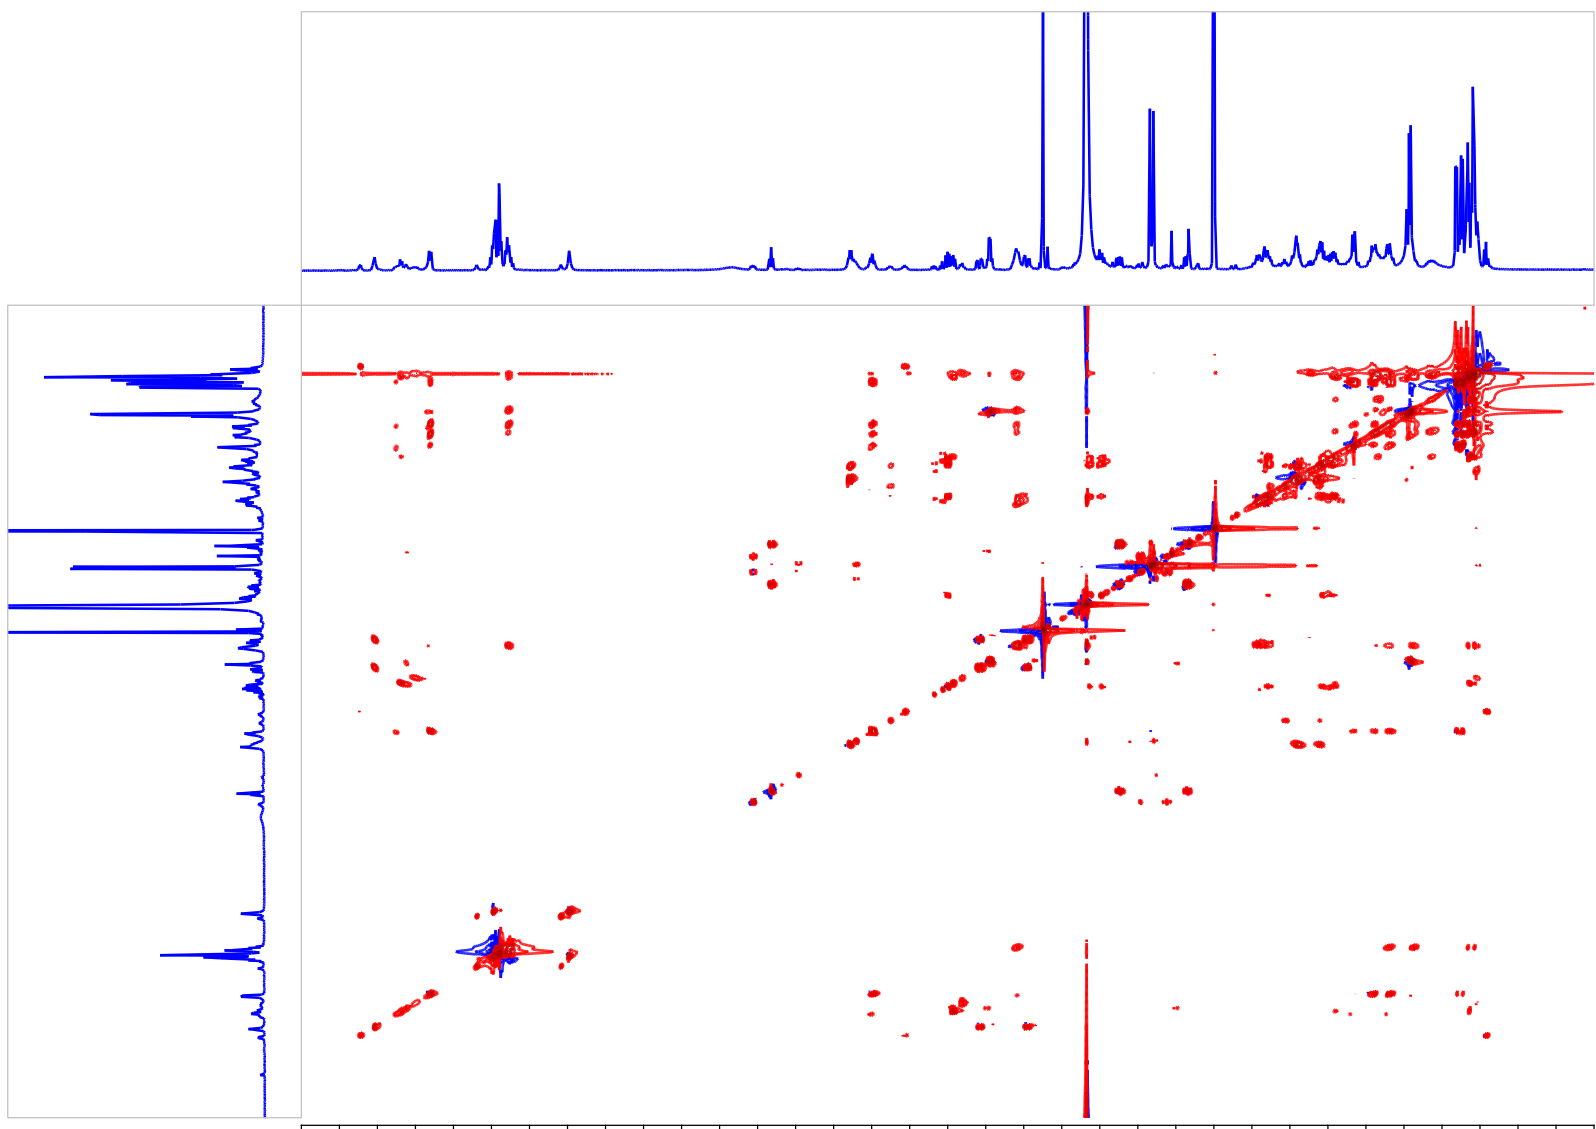

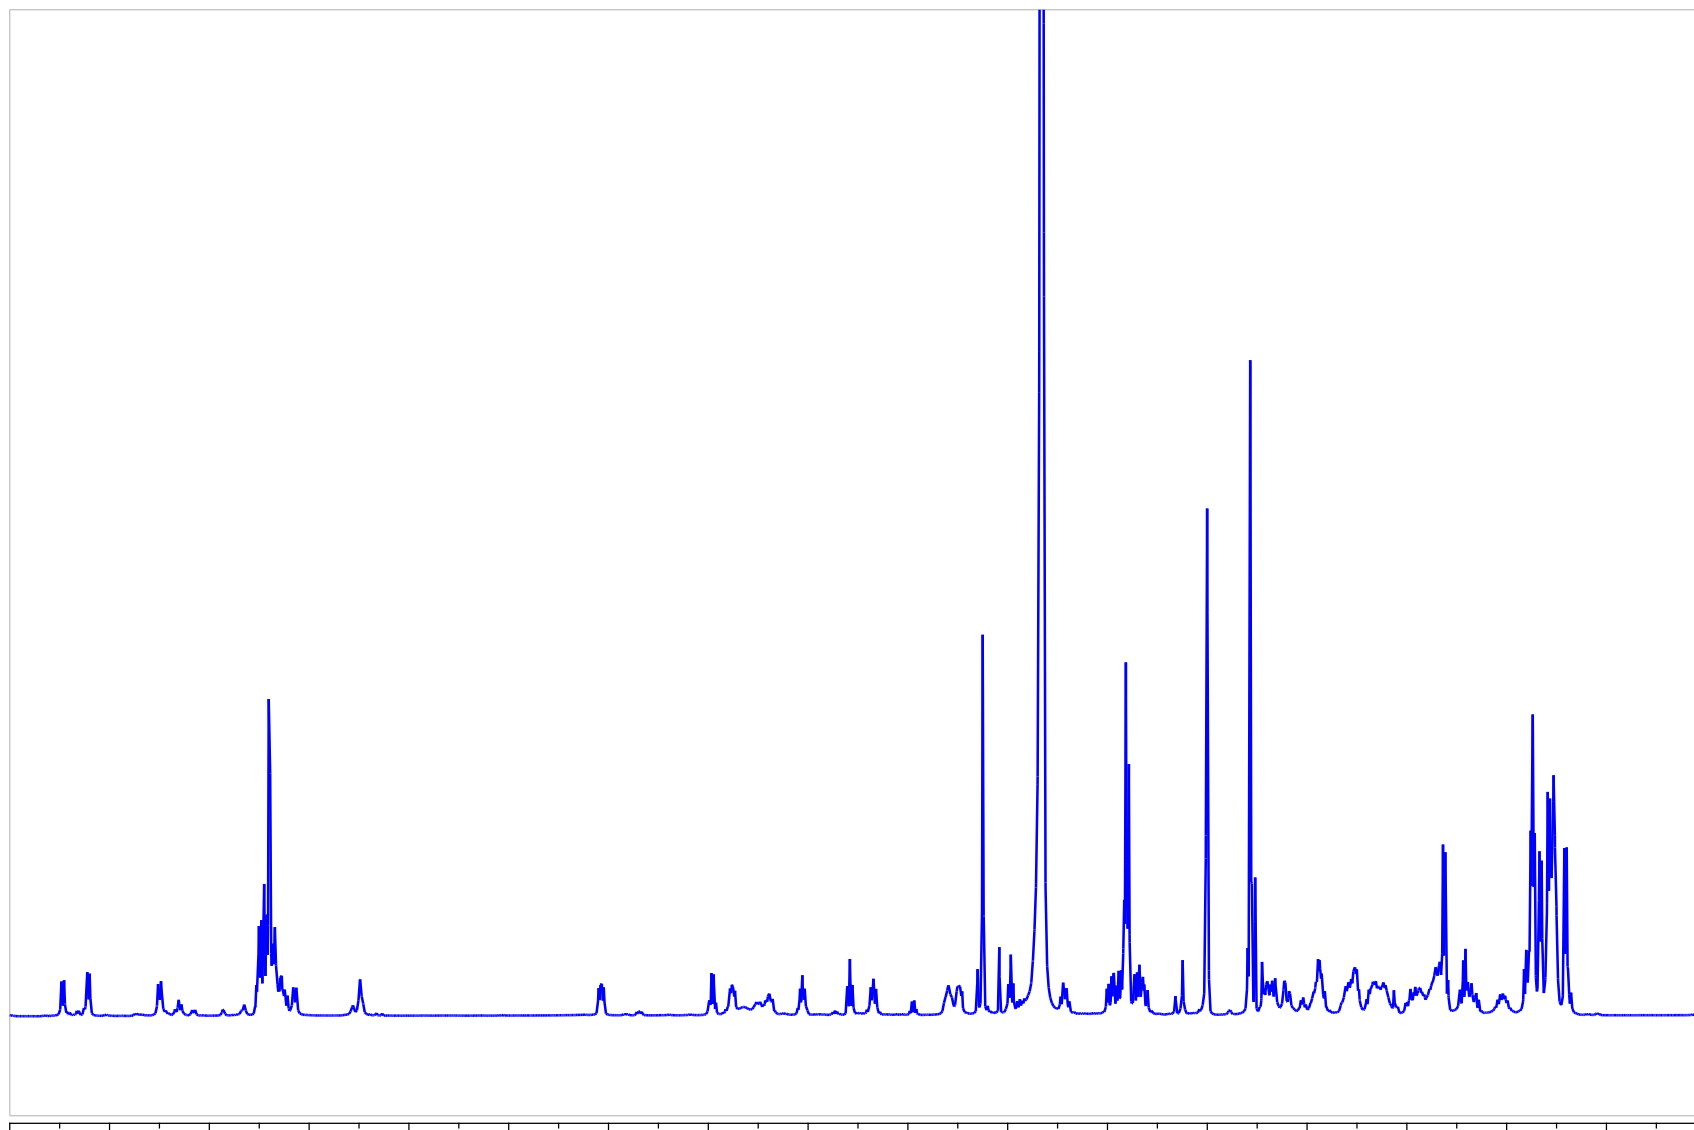

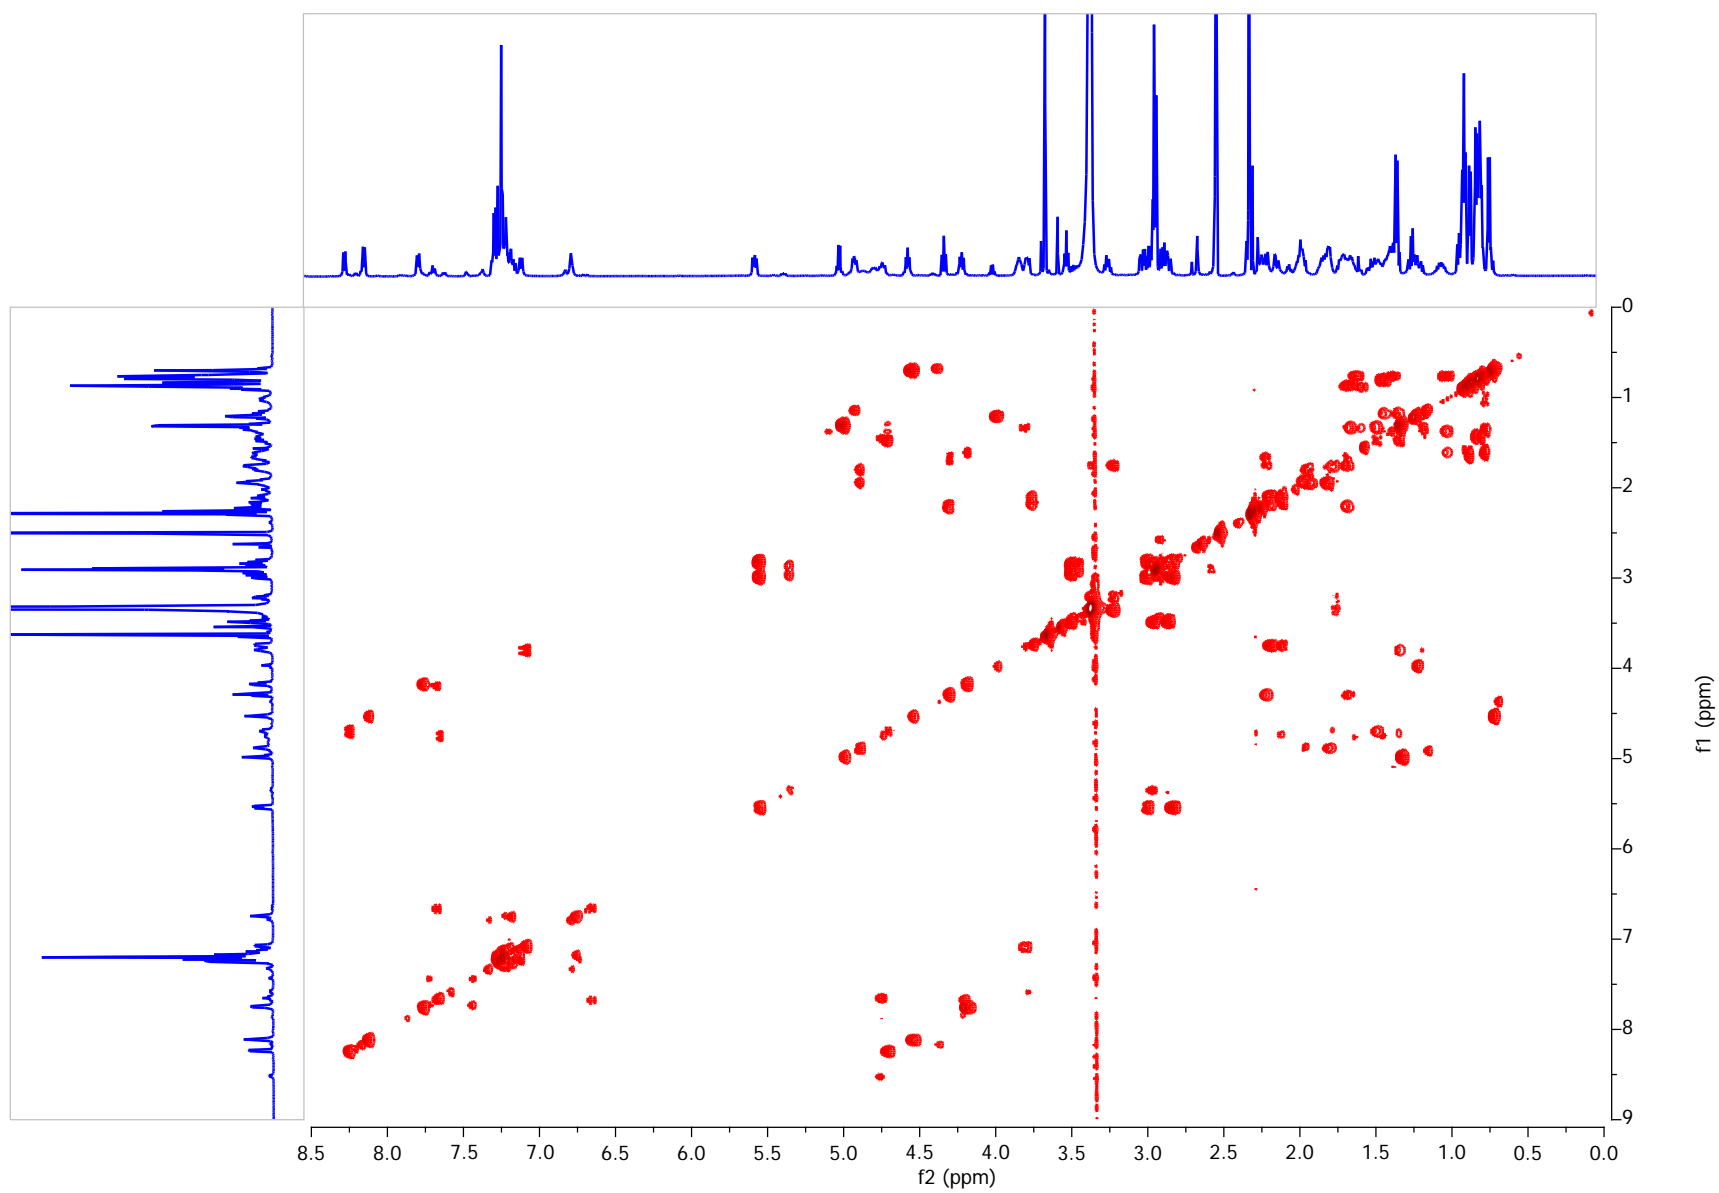

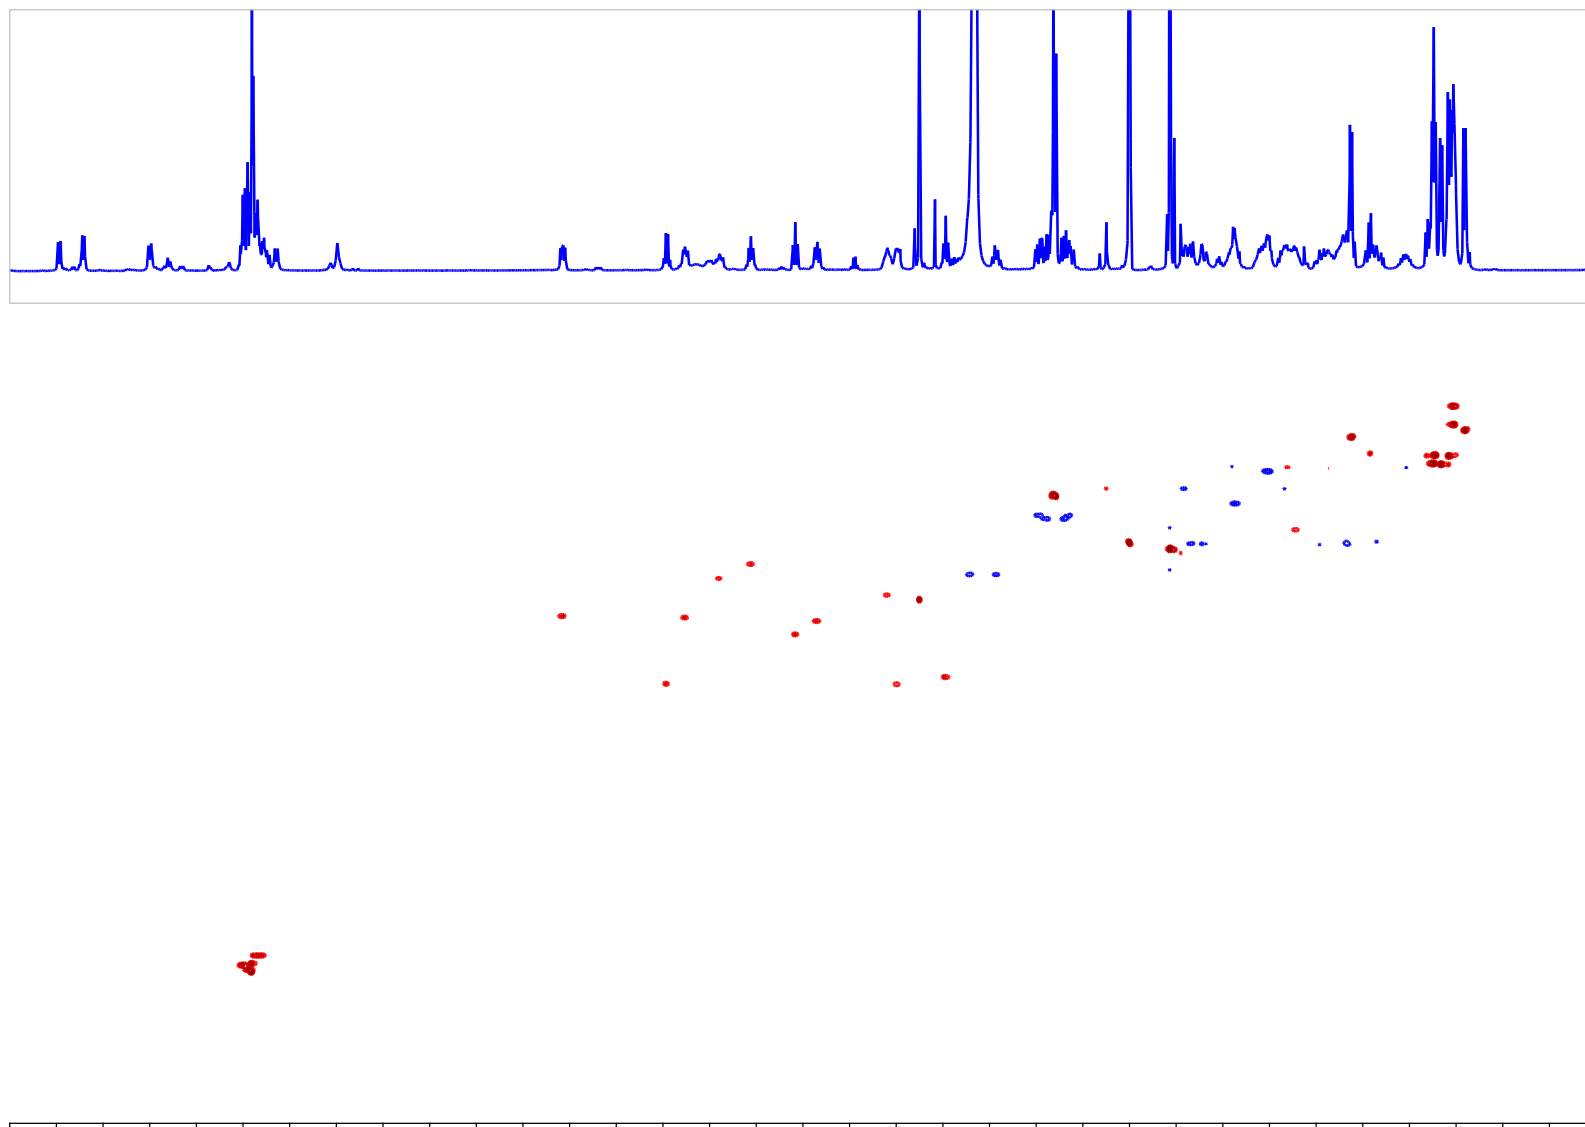

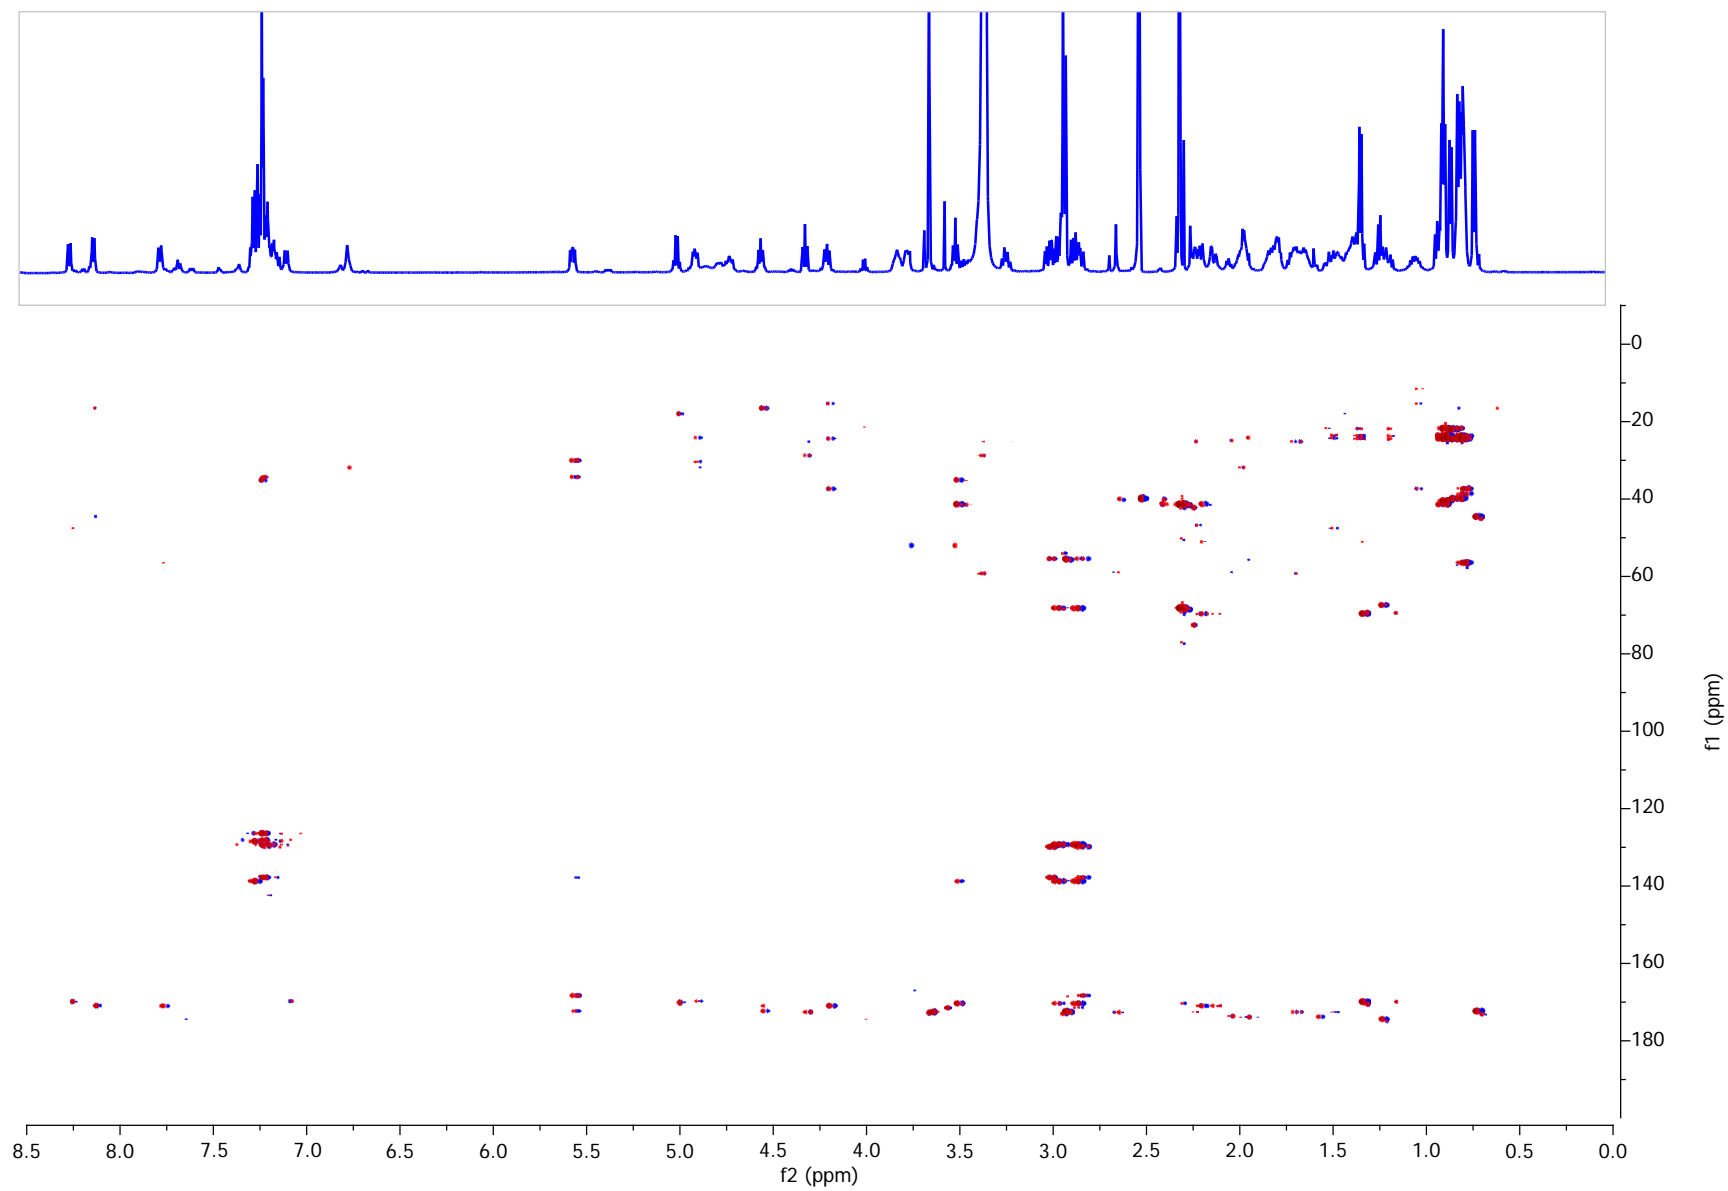

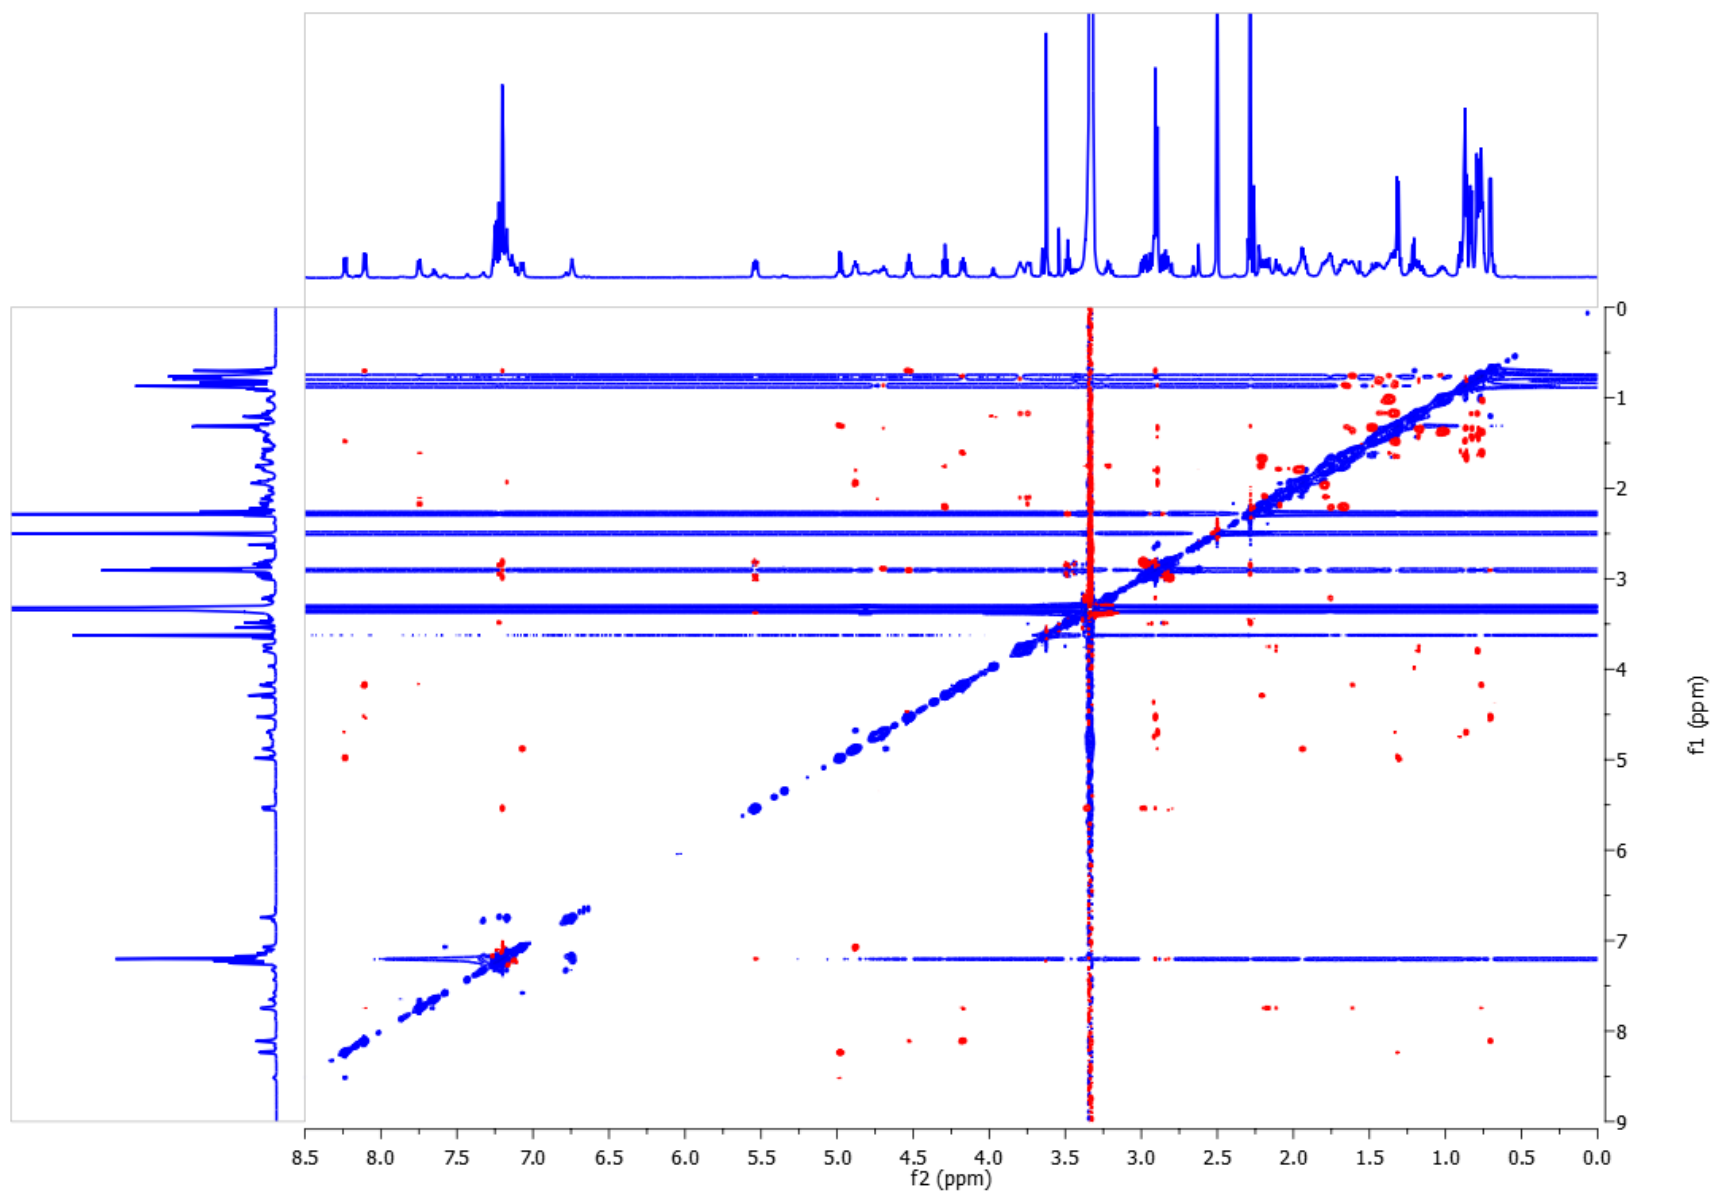

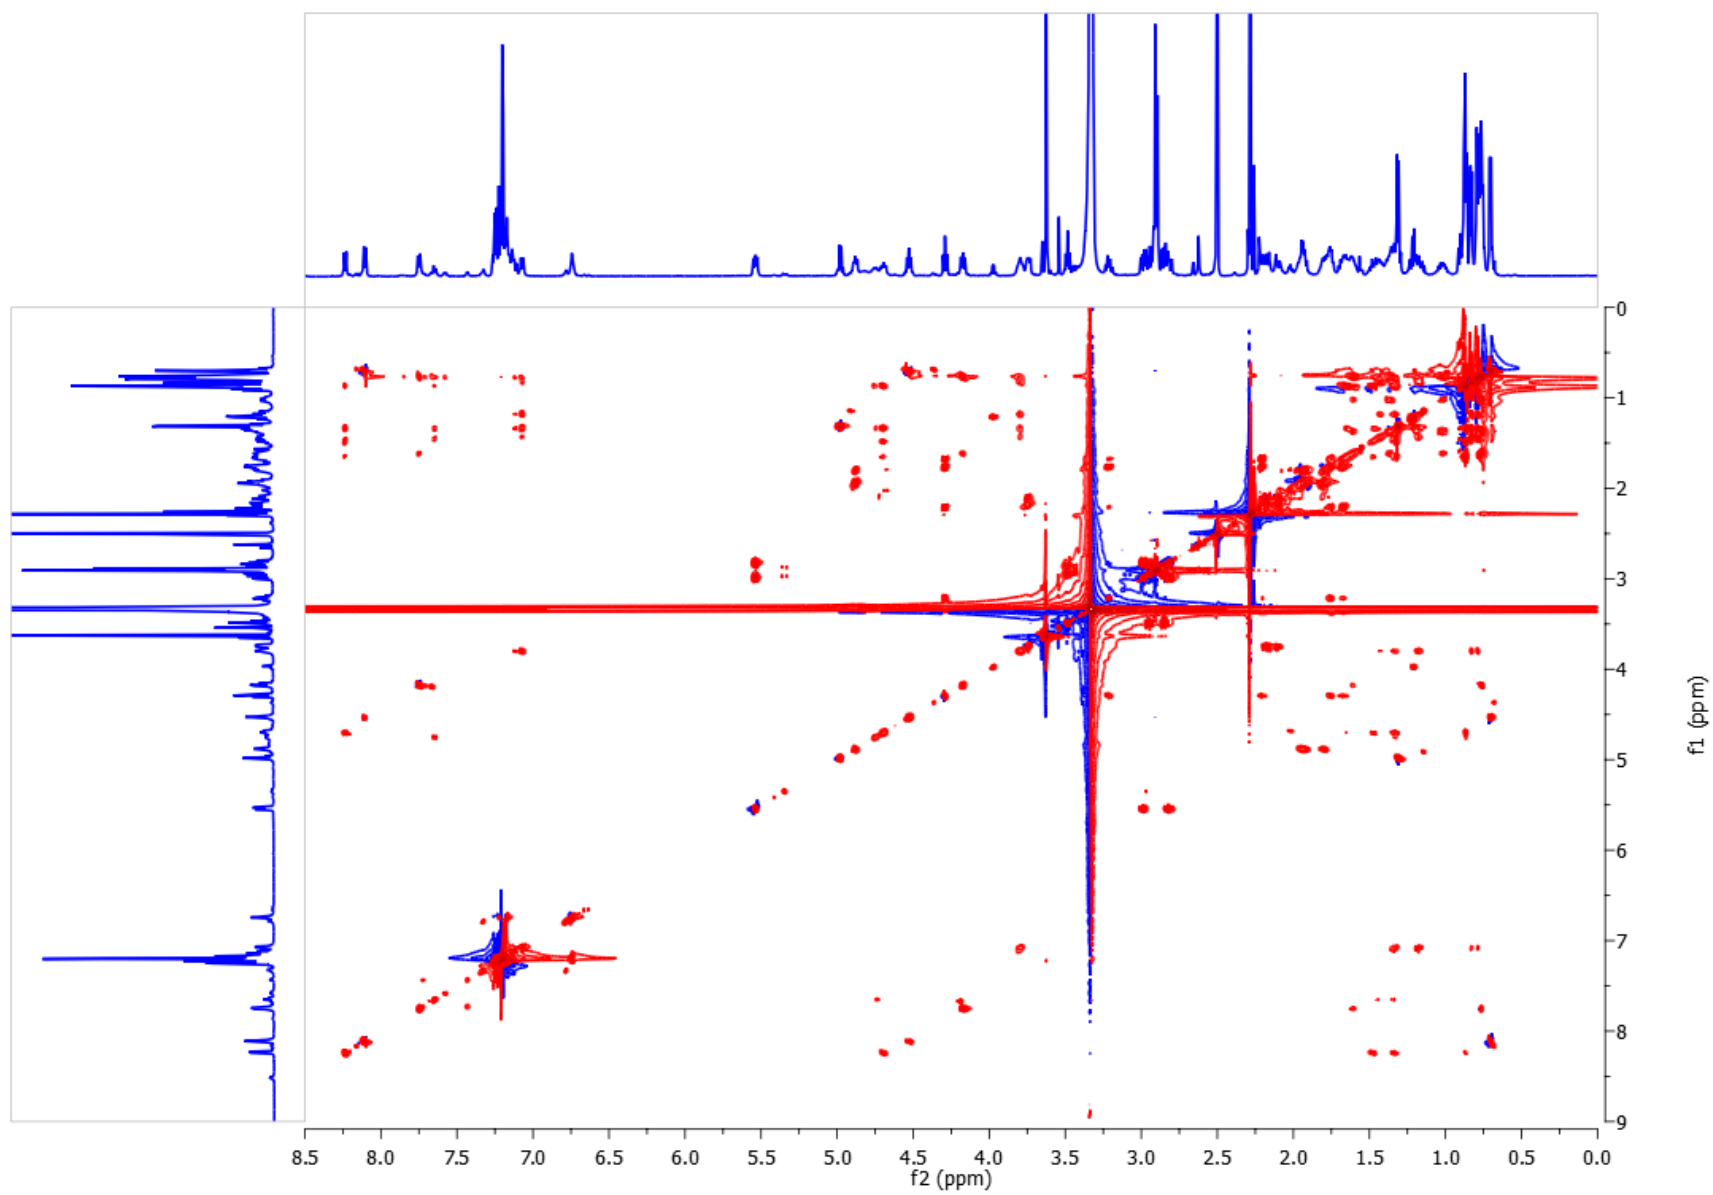

Supplement: NIHMS931002-supplement-Supporting_Information.pdf [file NIHMS931002-supplement-Supporting_Information.pdf]
